# Supplementary material
Source: PubMed Central journal article supplement (PMC3306709)
Supplement: 1120774109_sapp.pdf [file 1120774109_sapp.pdf]

## Supplementary Information Appendix Evans et al. (2012) The maximum rate of evolution in mammals

Supporting Information Corrected March 5, 2012

### Materials and Methods

#### Calculation of evolutionary rates

Clade maximum rate (CMR) examines the maximum of a phenotypic trait for a clade over evolutionary time. Fig. 1 illustrates how CMR is calculated for three clades: the green, red and blue clades. Within the green clade are five lineages, represented as broken lines. The time scale could be either individual generations, or multiple generations binned into time intervals. For the latter, the maximum of the lineage during that interval is plotted at the centre of the time interval, and maxima of adjacent time intervals are connected by a line. For each interval, the lineage with the maximum value is identified as the ‘clade maximum’, shown as the solid green line. The CMR is the rate of change between any pair of points along this line. In Fig. 1 the clade maximum has also been calculated for the red and blue clades, but their component lineages are not shown for clarity. The superclade of the green, red and blue clades also has a clade maximum, shown as the dashed black line. The rate of this clade maximum can be calculated in the same manner. The CMR is a conservative estimate, being a minimum estimate of the maximum rate because maximum body mass in an order at time  $t + 1$ , compared to the maximum body mass in the order at time  $t$ , is the minimum possible amount of change to account for the difference, occurring only if the largest species at  $t + 1$  evolved from the largest species at  $t$ . If the largest species at  $t + 1$  evolved from any other species at  $t$ , the rate would be higher.

We used the compilation (1) of the maximum body mass for each of 28 orders of Mammalia in each sub-epoch since 70 Ma (Mammoth database v. 1.0). We calculated rates for the mammal maximum and for the nine best sampled orders (Artiodactyla, Carnivora, Cetacea, Creodonta, Multituberculata, Perissodactyla, Primates, Proboscidea and Rodentia; the paraphyletic order Artiodactyla was analysed separately from cetaceans rather than the monophyletic Cetartiodactyla due to the very different pattern of body size increase). The mean of the natural log measurements was estimated as the natural log of the mean of untransformed measurements (2).

Cetacean body masses were estimated from a new regression equation of occipital condyle breadth ( $OCB$ , mm) vs mass ( $M$ , kg) for 18 odontocete and 11 mysticete species:

$$M = 4.924 \times 10^{-6} OCB^{3.858} \quad (\text{Eq. S1})$$

( $R^2 = 0.9447$ ,  $SE = 0.2716$ ,  $\%PE = 55.33$ ,  $\%SEE = 86.89$ ).  $\%PE$  is the percent prediction error and  $\%SEE$  is the percent standard error of the estimate (3, 4). Cetaceans are the only group where the maximum is found in the present day, and so underestimations of fossil taxa would result in an overestimation of the evolutionary rate. Poor sampling in the Oligocene and Early Miocene may result in underestimation of maximum size of this group, but it is unknown if this lower sampling is more extreme than for many other groups.

The maximum mass of artiodactyls in North America was calculated for 18 families and the continent as a whole for each North American Land Mammal sub-age.

For each sequence of maxima, all combinations of time points were compared. Only rates of increase in maximum size were calculated for the maximum mammalian body size, as these must be due to evolutionary change, but decreases may be due to extinctions of the previous maximum and so do not represent rates of evolution. The clade maximum rates method could also be applied to the minimum of a clade, in which case only decreases could be assessed. A

major advantage of the clade maximum metric is that a detailed phylogeny is not required, only the recognition of distinct clades.

Several methods were used to estimate body mass standard deviation ( $s_p$ ). The body mass standard deviation was estimated for 64 species from eight orders from published data (5) as  $(\ln(\text{maximum}) - \ln(\text{minimum}))/4$ , based on an estimate that 95% of normally-distributed observations are within two standard deviations of the mean. The mean standard deviation of this estimate was 0.145, which is very similar to that of 0.15 (6) and 0.14 (7). We therefore used the value of 0.15. Using a higher estimate of 0.2 reduces all log changes in Fig. 3 by a factor of 0.125, therefore having only a small effect on the overall pattern.

For comparison, the coefficient of variation of body mass in modern mammals (8) for six species of three orders gave a mean of 0.140. The mean standard deviation for body mass estimates for fossil *Homo sapiens* (9) was 0.138. For a mass death assemblage of *Teleoceras major* where maximum and minimum body size estimates were made (10), the standard deviation was 0.070. The standard deviation for a large number of linear characters also compiled for this study was 0.054, and with an average scaling of these characters to body mass of 3 gives an estimate of the variation in body mass of 0.162.

A two-fold difference in the minimum and maximum (e.g. minimum size 1 kg, maximum size 2 kg) gives a ln standard deviation of  $(\ln(1)-\ln(2))/4 = 0.173$ , which is the average value for Artiodactyla.

Our results suggest that body size changes greater than 2-fold require much longer time periods. This is interesting because the range of size within a species is typically about 2-fold (ln standard deviation of mammals is 0.15, while a 2-fold range gives 0.17), suggesting that size changes >2-fold might involve evolution above the species level.

Generation time was estimated as age at first parturition (age at first reproduction plus gestation time (11)) from the data for 839 placental mammal species and for 82 marsupial species (12). Ordinary least squares regression of body mass on generation time yielded the following relationships:

$$G_{plac} = 0.175M^{0.259} \quad (\text{Eq. S2})$$

$$G_{mars} = 0.531M^{0.091} \quad (\text{Eq. S3})$$

where  $G_{plac}$  and  $G_{mars}$  are generation time in years for placentals and marsupials respectively and  $M$  is body mass in grams. 95% confidence intervals for the slopes of the placental and marsupial regressions are 0.247-0.272 and 0.056-0.126 respectively. This does not incorporate the effects on generation time of varying  $r$ - and  $K$ -selection strategies, but such detailed life history information is difficult to extract from the fossil record.

The generation time  $G$  of an organism is dependent on mass  $M$  according to an allometric scaling function:

$$G = b_0 M^{b_1} . \quad (\text{Eq. S4})$$

The number of generations or biological time  $t_g$  experienced by a lineage or population is equal to the chronological time  $t$  experienced divided by generation time:  $t_g = t / G$  or in differential form,  $dt_g = dt / G$ . Rearranging and substituting in Equation S4, we obtain

$$\frac{dt_g}{dt} = \frac{1}{b_0 M^{b_1}} . \quad (\text{Eq. S5})$$

If mass increases exponentially with exponential rate constant  $\alpha$  per generation, then

$$\frac{1}{M} \frac{dM}{dt_g} = \frac{d(\log M)}{dt_g} = \alpha , \quad (\text{Eq. S6})$$

which in integrated form is

$$\log M = \alpha t_g + \log M_0, \quad (\text{Eq. S7})$$

where  $M_0$  is the initial body mass at  $t_g = 0$ .

$\alpha$  forms the basis for the calculation of the Haldane  $h$  and many other measures of evolutionary rates (e.g.,  $h = \alpha/s_p$ , where  $s_p$  is body mass standard deviation as defined above). To get the corresponding equations for Equations S6 and S7 in terms of chronological time we note that

$$\frac{dM}{dt} = \frac{dM}{dt_g} \frac{dt_g}{dt} \quad (\text{Eq. S8})$$

and substitute Equations S5 and S6 into Equation S8, thereby obtaining

$$\frac{dM}{dt} = \left( \frac{\alpha}{b_0} \right) M^{1-b_1}. \quad (\text{Eq. S9})$$

The integrated solution is

$$M^{b_1} = \frac{\alpha b_1}{b_0} t + M_0^{b_1} \quad (\text{Eq. S10})$$

This shows that  $M^{b_1}$  depends linearly on chronological time  $t$  with a slope  $s$  of  $s = \alpha b_1/b_0$ . Thus, the rate of change in body size per generation is

$$\alpha = \frac{s b_0}{b_1} \quad (\text{Eq. S11})$$

and the rate of evolution of body mass can be estimated by determining through linear regression the parameters  $s$  and the coefficients  $b_0$  and  $b_1$  of the generation time allometric equation. The number of generations  $N_g$  occurring between two time points can now be obtained from Equations 6 and 11 as

$$N_g \equiv dt_g = \frac{b_1 d(\log M)}{s b_0}, \quad (\text{Eq. S12})$$

which can be calculated for two time points and their respective masses  $M_1$  and  $M_2$  as

$$N_g = \left( \frac{b_1}{s b_0} \right) (\log M_2 - \log M_1). \quad (\text{Eq. S13})$$

This calculation gives an analytically exact interpolative estimate of the interval length for that time interval.  $s$ , the slope of the time ( $t_y$ , in years) vs  $M^{b_1}$ , can be calculated as:

$$s = \frac{M_2^{b_1} - M_1^{b_1}}{t_{y_2} - t_{y_1}}. \quad (\text{Eq. S14})$$

The pattern of increase in maximum body mass of terrestrial mammals (as  $M^{0.259}$ ) from 70 to 30 Ma was assessed with linear ordinary least squares (stats:lm), linear segmented (segmented), Gompertz (drc), square root (nls), exponential (nls) and logistic (nls) regressions in R Statistical Environment v. 2.10.1 (13) using the packages in brackets. The OLS regression model was the best fit according to Akaiki information criterion (AIC) using the stats:AIC function (13). AIC was calculated as:

$$AIC = -2p + k \cdot npar \quad (\text{Eq. S15})$$

where  $p$  is the log-likelihood,  $npar$  is the number of parameters in the fitted model, and  $k = 2$ . The log-likelihood and number of parameters for each model are indicated in Tables S1 and S3.

The pattern of increase in  $M^{0.259}$  maximum size for seven orders from their origin to their maximum was also assessed using OLS linear regression (Table 1). The pattern of increase in cetaceans was examined for the period of the Oligocene to the Recent as the increase to the first local maximum (*Basilosaurus*) is represented by only a single time interval. In addition to using a generation scaling coefficient of 0.259, all analyses were also repeated with a generation scaling coefficient of 0.25 (Tables S2 and S3).

### Reference database of evolutionary rates

We calculated evolutionary rates for mammal data in references that cited previous compilations (6, 14, 15) and others where sufficient data were present in the original paper to allow estimation of body mass and time intervals. Table S4 lists the sources of data for body size, generation time and interval length for the studies used. Data quality for these sources will be variable, depending on factors such as the accuracy of the identification of ancestor-descendant pairs and the date at which the derived morphology was actually attained. Nonetheless we have confidence in the general pattern of results that depend on them.

For most references, generation times and interval lengths were calculated as per maximum size. For others, the generation times have been estimated from a method other than directly from the body mass-generation time regression (for example, where the authors themselves or another author since has estimated the generation time), and these were used to calculate interval length in number of generations:

$$N_g = \frac{t_{y_2} - t_{y_1}}{\sqrt{G_2 G_1}}, \quad (\text{Eq. S16})$$

where  $G_1$  and  $G_2$  are the generational times at times 1 and 2 respectively, giving the geometric mean of the start and end generation times. For small changes in body mass (e.g. <10-fold change) the differences in the interval lengths calculated by the two methods are minor (<2%).

### Random walk simulations

Several sensitivity tests were conducted to examine whether the incompleteness of the fossil record and/or binning data by sub-epoch biased rate calculations. We conducted a random walk simulation with various levels of preservation. Each simulation comprised 100 independent random walks, with the movement up or down at each of the 1000 steps drawn from a normal distribution of mean 0, s.d. 1. The walks were divided into 10 subclades, and time was divided into 10 intervals. The maximum within each subclade and for the whole clade was calculated for each interval. The rates of change in the subclade and clade maxima were calculated per interval. The process of fossilization was simulated by downsampling the data to between 1% and 0.005% of all steps in all walks. Maxima in each interval and rates of change were then calculated for each subclade and clade. One hundred simulations were run with different sets of walks. 95% confidence intervals of rates for the full and fossilized datasets over all simulations were compared to see whether the fossilisation process gave a biased higher or lower estimate of the true rates (Table S5). This indicated that the estimated evolutionary rates are not significantly biased due to these effects, although at very low preservation levels variation in measured rates increased.

### **Examples of island dwarfism**

The key examples of large decreases examined here are instances of island dwarfism, the Jersey red deer (16) and insular pygmy elephantids (17-19). These are the only examples of large change (over half an order of magnitude) for which body mass estimates have been made and there is some estimation of the timing of the split from the large ancestral species. The Jersey deer represents a change from about 200 kg to 36 kg during a maximum of 5800 years (16). As this is a maximum estimate of the divergence time, this will represent a minimum and therefore conservative estimate of the evolutionary rate.

Three examples of pygmy or dwarf elephants are examined here. The first is the pygmy elephant (*Elephas falconeri*) that evolved on Sicily and Malta, with an estimated mass of 100 kg (17). *Elephas falconeri* was probably a descendant of *E. antiquus*, which weighed approximately 10,000 kg (20). Second, the Cyprus pygmy elephant (*Elephas cypriotes*) weighed around 200 kg (18) and was also probably descended from *E. antiquus*. We have used an estimate of 800,000 years as the divergence time between *E. antiquus* and each of *E. falconeri* and *E. cypriotes*, as *E. antiquus* did not arrive in Europe until the start of the Middle Pleistocene (0.8 Ma) (61). Third is the California Channel Islands mammoth (*Mammuthus exilis*) of about 1,000 kg, derived from the mainland *Mammuthus columbi* (around 10,000 kg). The dwarf mammoth would have evolved in less than 85,000 years (19).

The Mediterranean proboscidean pygmies represent the greatest change in body mass for insular dwarfism that we are aware of, at up to 2 orders of magnitude between ancestor and descendant. If the dates of divergence differ from the estimated range of 0.8 million years, the horizontal position of the point in Fig. 3 will move but not the vertical.

### **Asymmetry of increases and decreases**

The apparent asymmetry between rates of increases and decreases would be falsified if fossil evidence of rapid gigantism were found. We expect that it would be easier to find examples of gigantism compared to dwarfism in the fossil record due to the bias of finding larger fossils compared to small ones. For instance, even at a distance of 65 million years, dwarfed, presumably island forms of dinosaurs have been recognized in the Hațeg basin (21), but no instances of such dramatic insular gigantism in mammals are known. Examples such as the giant rabbit of Minorca (22) are undated, and represent less than one order of magnitude change from a probable ancestor.

## Figures

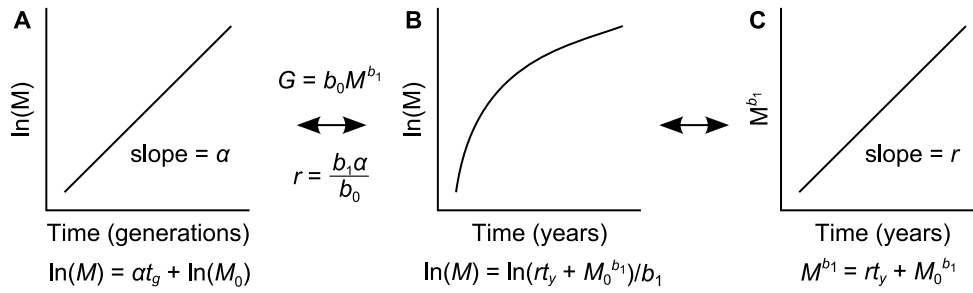

**Fig. S1.** Exponential increase in body size in biological time is curvilinear in chronological time but linear when mass is scaled to account for generation time. **(A)** When evolutionary increase in body size ( $M$ ) is exponential over biological time (in generations  $t_g$ ), change in log mass is linear. **(B)** Assuming that generation time ( $G$ ) increases with mass,  $G = b_0 M^{b_1}$ , log mass shows a slowing in the rate of increase in body size in chronological time (in years  $t_y$ ). **(C)** When  $M^{b_1}$  is plotted versus chronological time, this trajectory is linear with a slope  $r$ . The rate of increase per generation  $\alpha$  can be calculated from the slope  $r$  by multiplying by  $b_0/b_1$ .

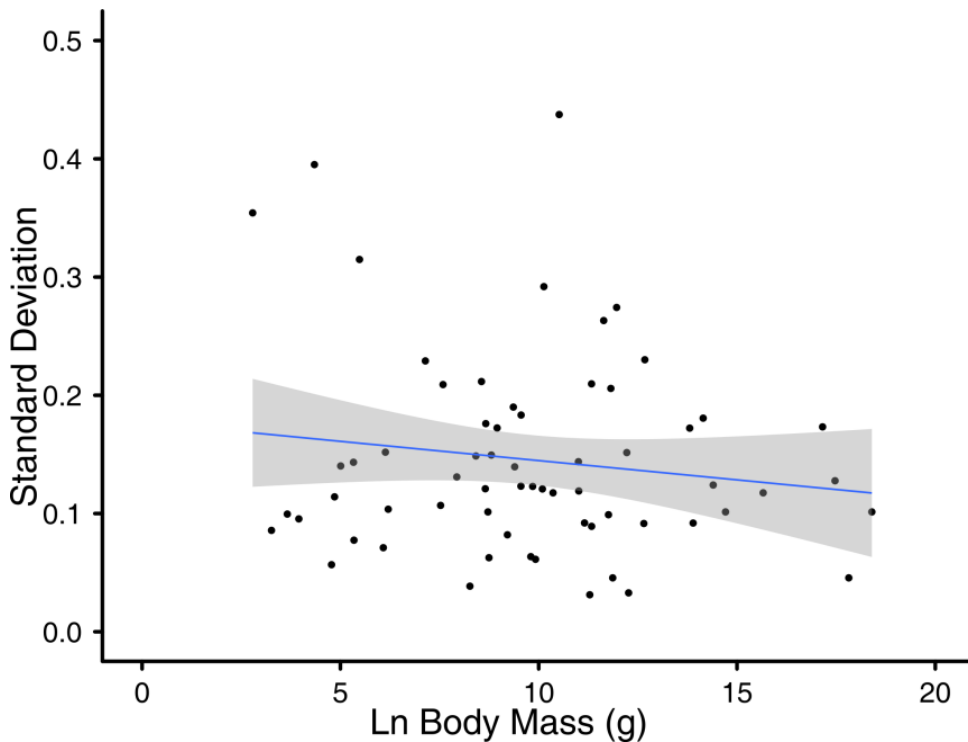

**Fig. S2.** Ln body mass vs standard deviation for 64 species of modern mammals (30). Mean  $\pm$  s.e. =  $0.145 \pm 0.011$ , 95% Confidence Interval = 0.124 to 0.167.

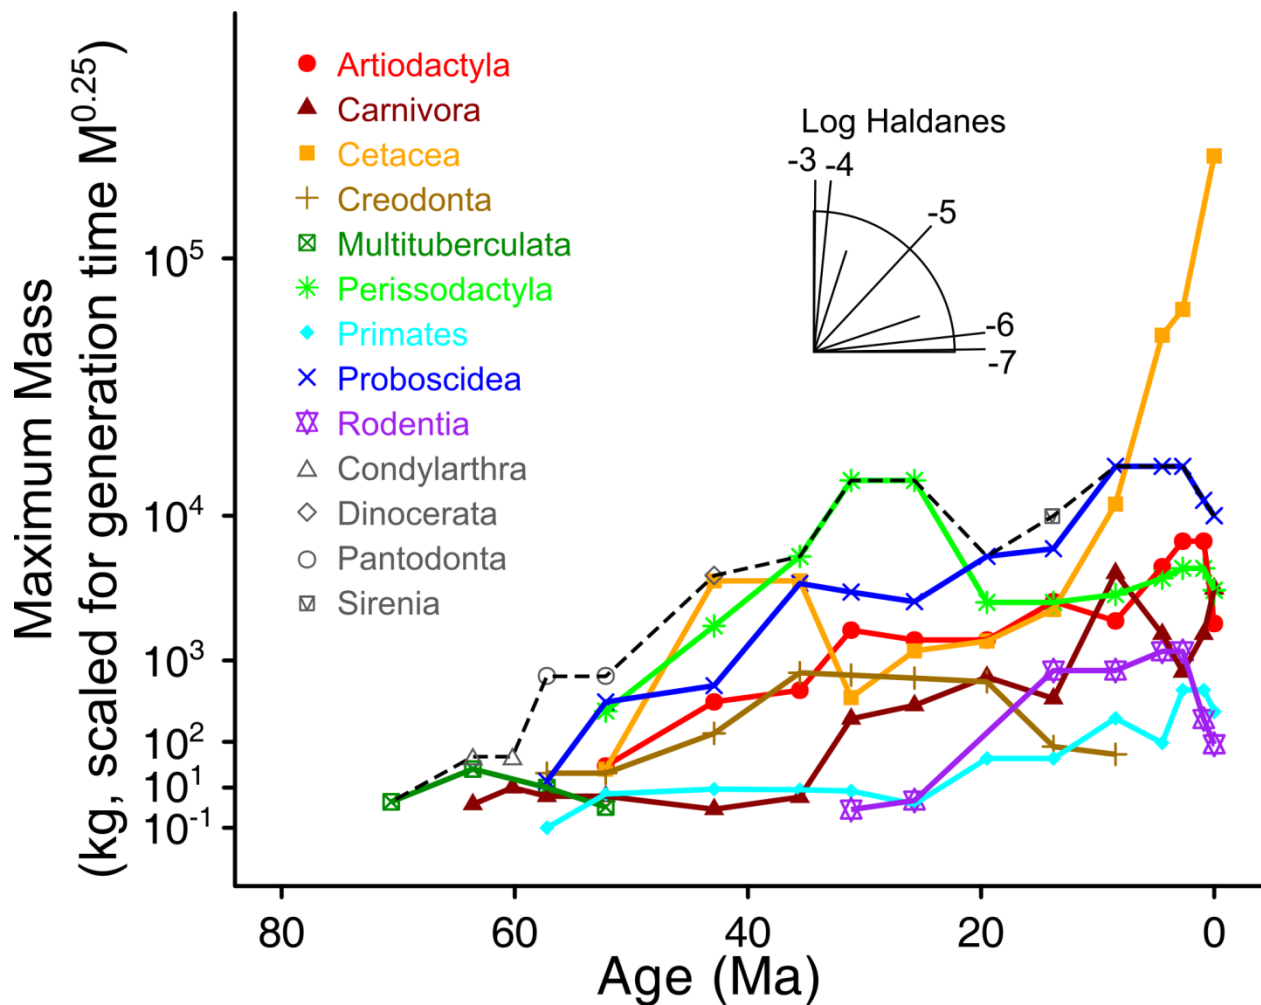

**Fig. S3.** Maximum mammalian body mass over time for terrestrial mammals (dashed black line) and separate mammal orders (colored lines). Mass is scaled to the power of 0.25 on the y axis (given a theoretical  $M^{0.25}$  scaling of generation times), so the slope of lines indicates generation time-corrected evolutionary rates as indicated by angular scale (haldanometer). This shows that there is no major difference in the pattern when the theoretical expected value of 0.25 is used rather than the empirical scaling coefficient of 0.259 for generation time to body mass.

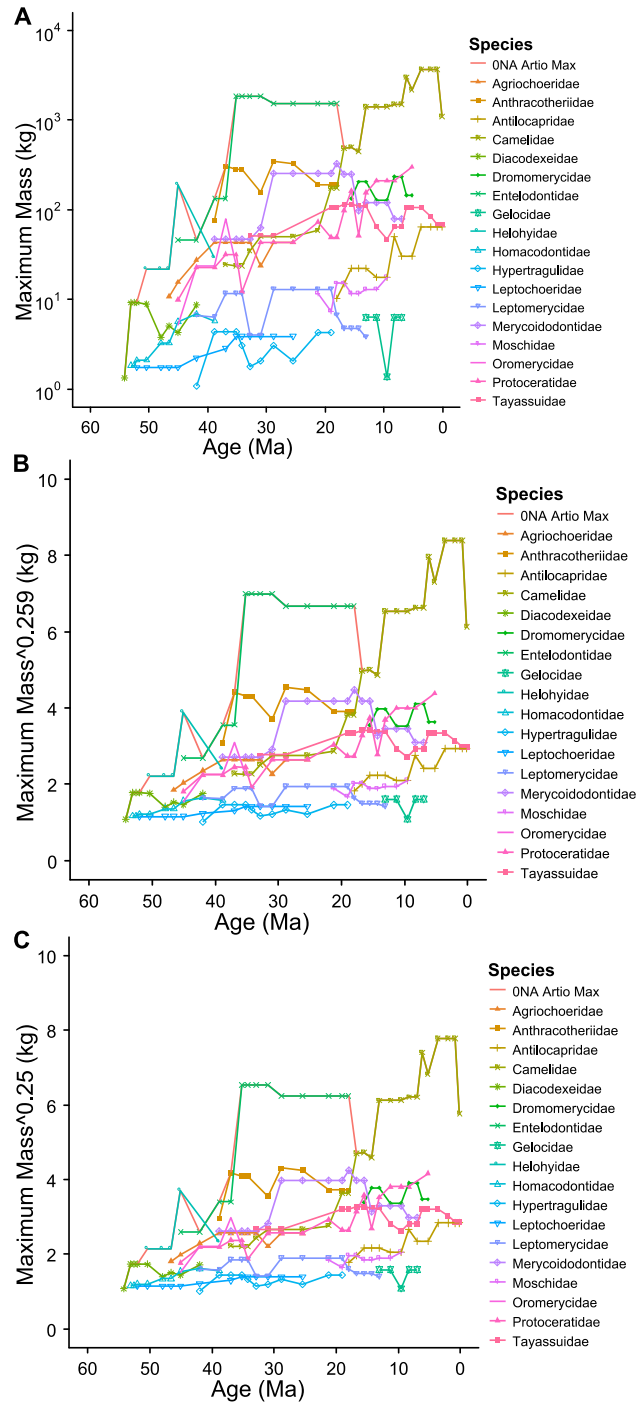

**Fig. S4.** Maximum body mass over time for North American artiodactyls for (A)  $\log(M)$ , (B)  $M^{0.259}$  and (C)  $M^{0.25}$ .



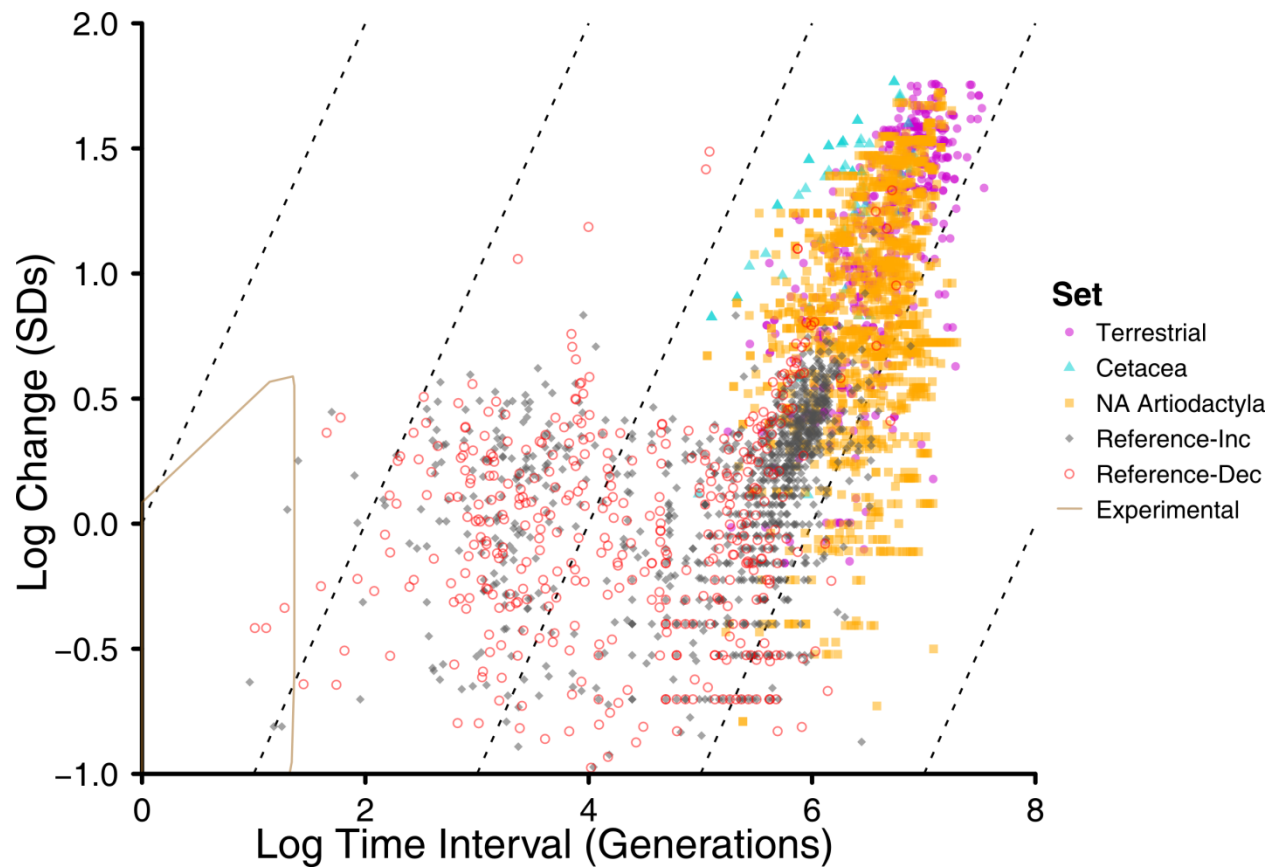

**Fig. S5.** Individual rate calculations for interval vs change for all datasets examined. Fig. 3 was generated by calculating minimum convex polygons of these data. For the experimental data, only the minimum convex polygon of the published data were available (3, 14).

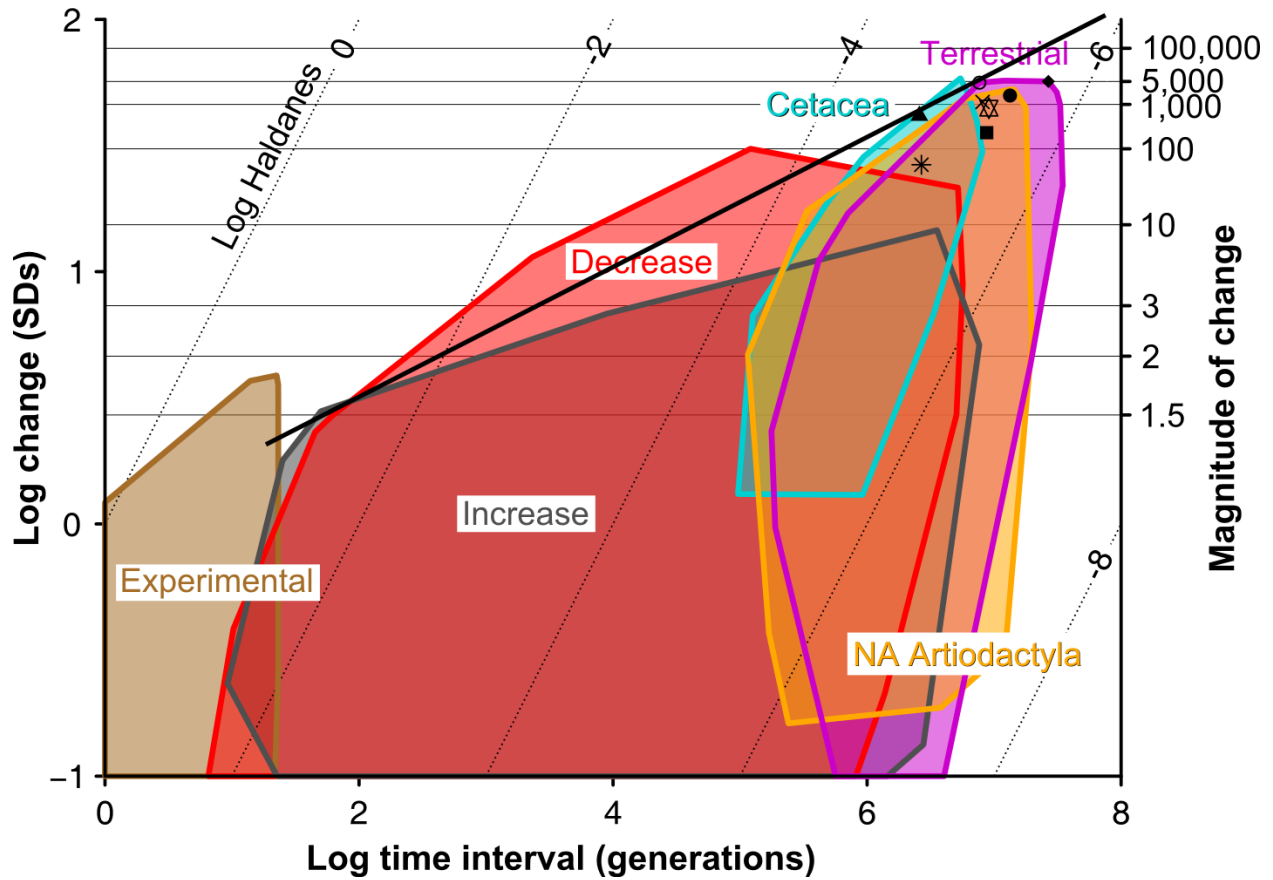

**Fig. S6.** Maximum rate of body mass increase scales as  $\sim 0.25$  of interval length. Extrapolating this relationship predicts that an interval of about 24 million years is required for a mouse-to-elephant body size transformation (100,000-fold).

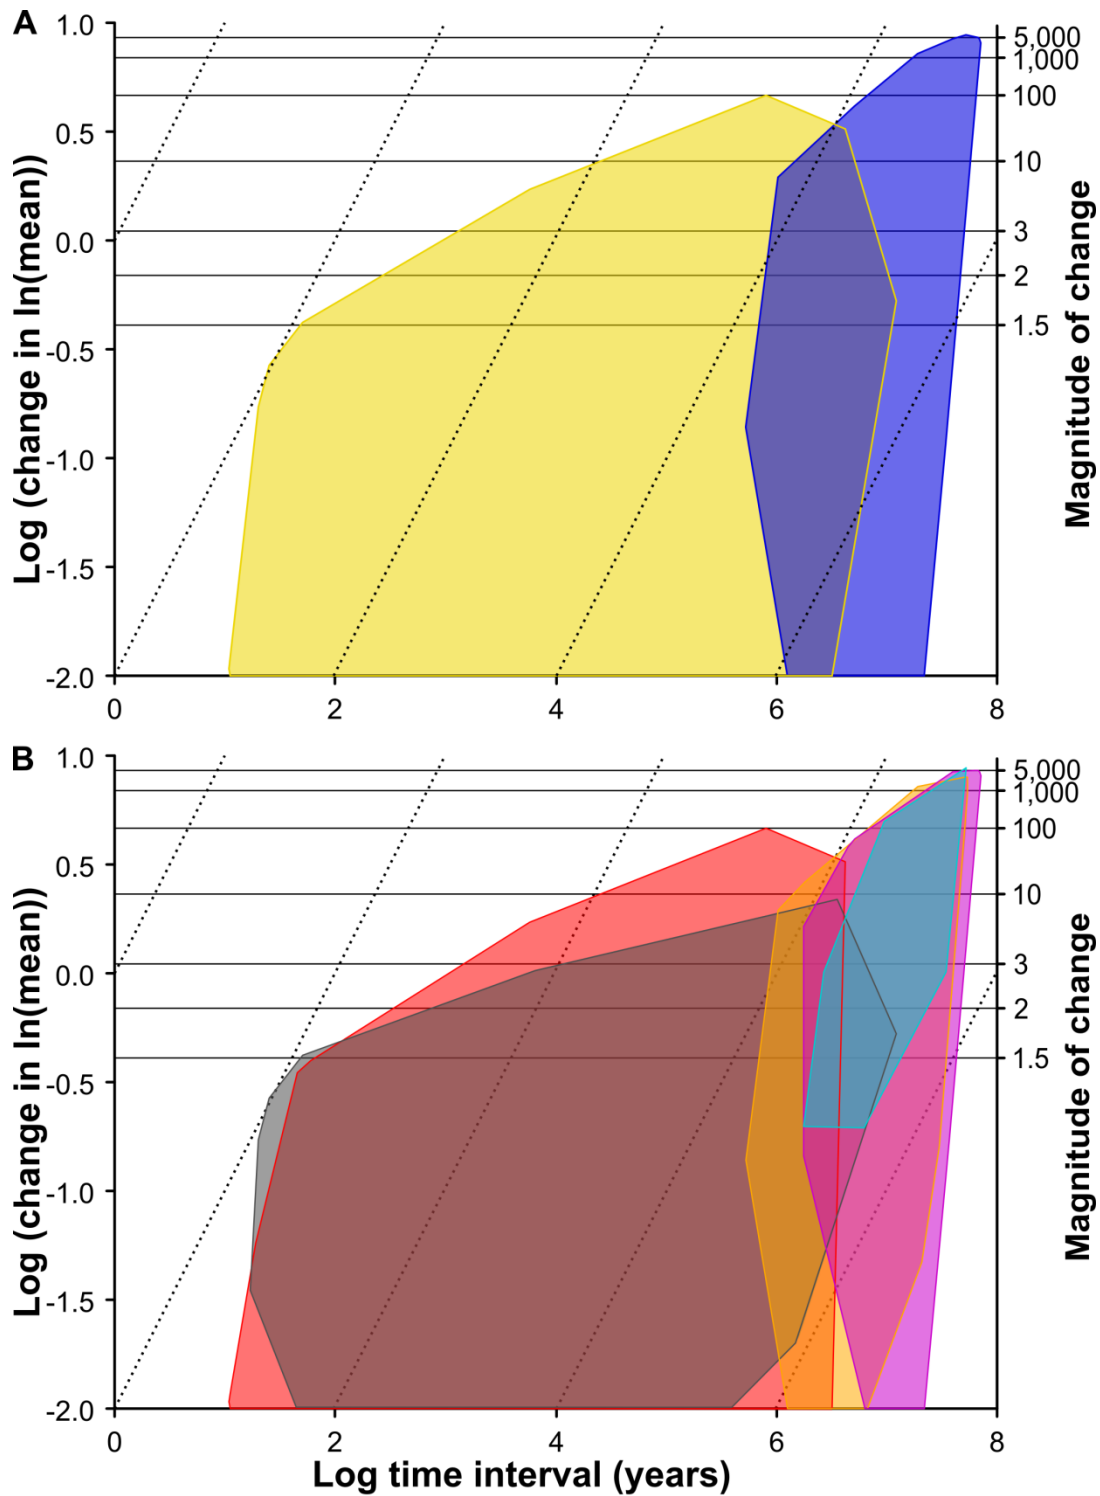

**Fig. S7.** Rates of evolution for large changes in mammalian body mass with change in  $\log(\text{difference in } \ln(\text{mean}))$  and time interval in years. This gives evolutionary rate in darwins, plotted as isodarwins (diagonal dotted lines). Color scheme as in Fig. 3. Experimental rates are not calculated here as intervals were only given in generations, not years.

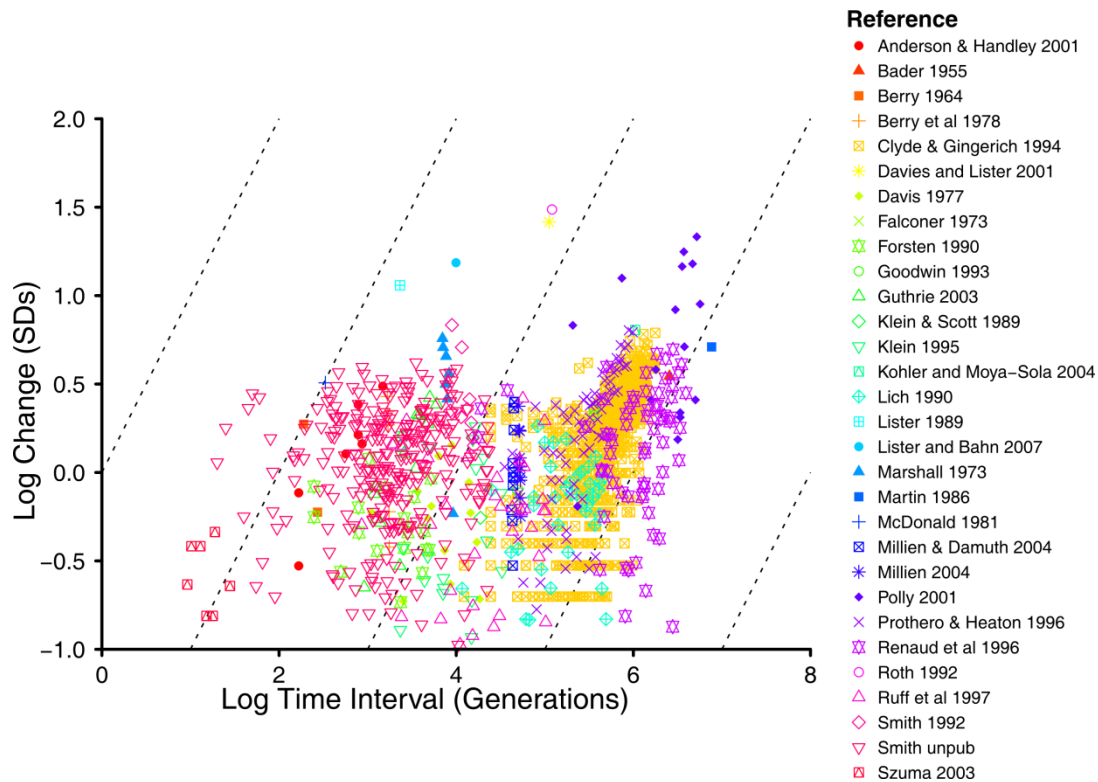

**Fig. S8.** Change vs time interval for reference database showing data separately for each study.

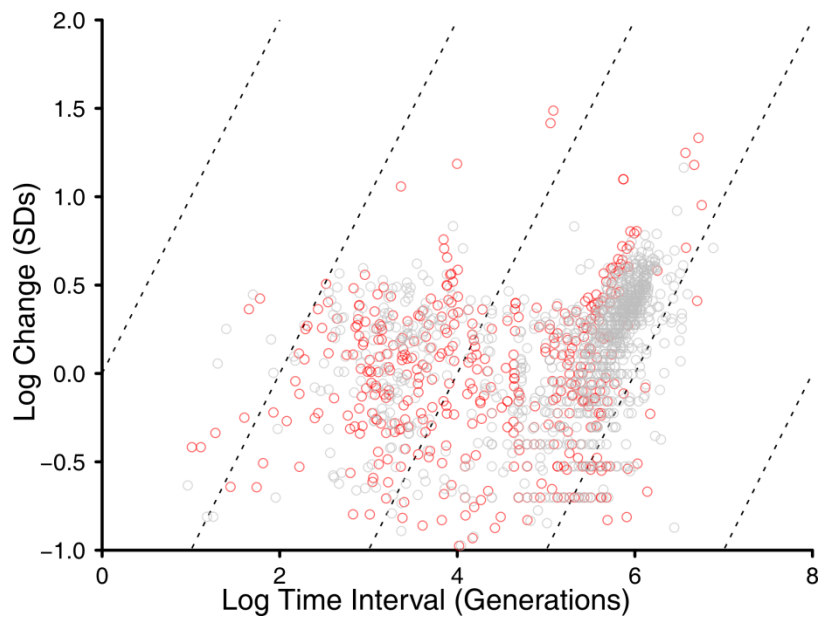

**Fig. S9.** Change vs time interval for reference database showing negative (red) and positive (gray) change.

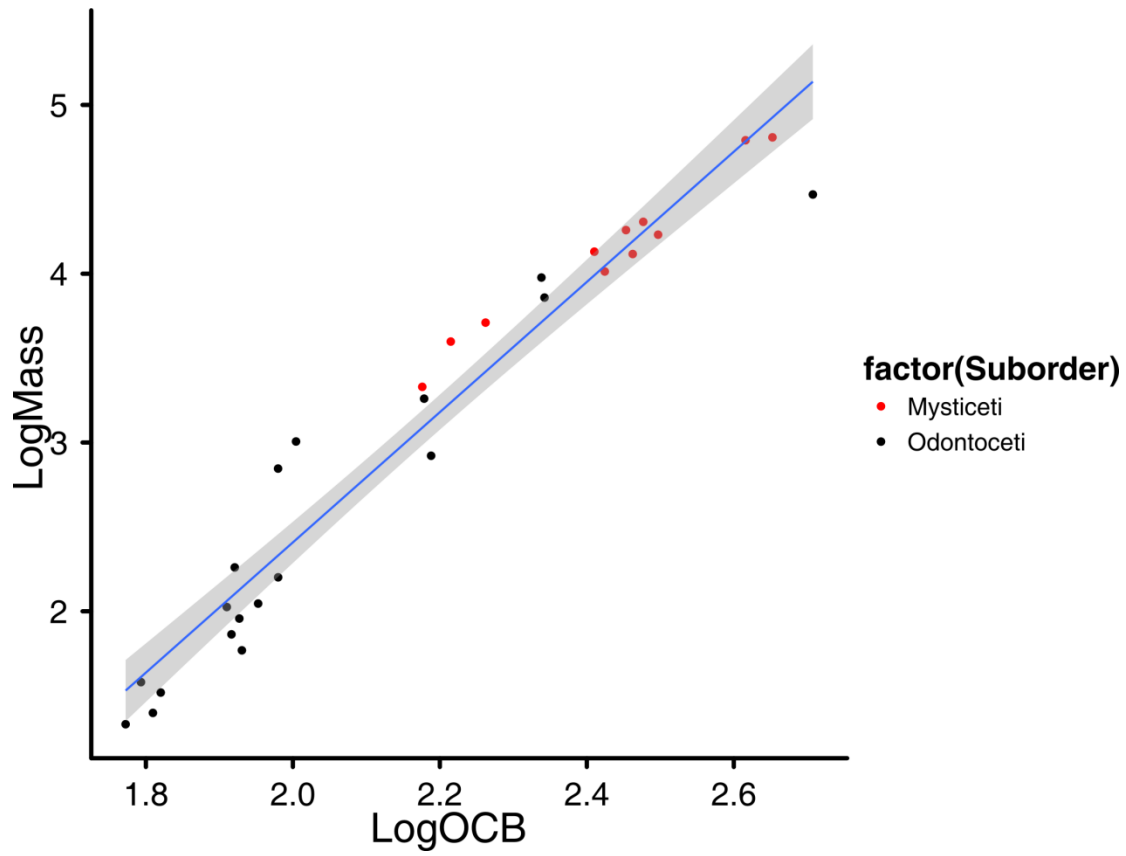

**Fig. S10.** Log(Mass) vs Log(OCB) for 18 odontocete and 11 mysticete species.

A

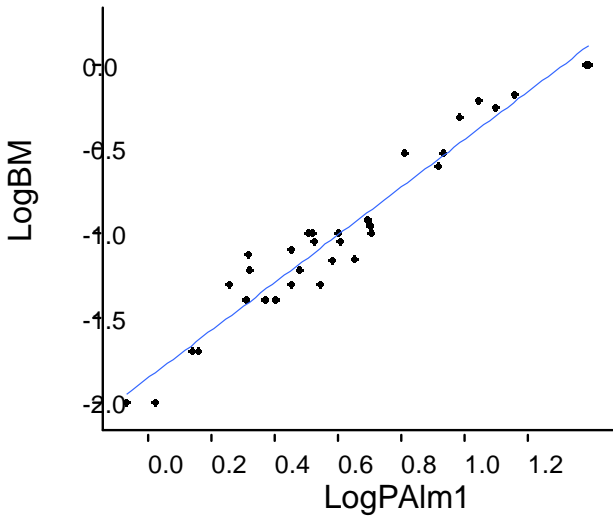

B

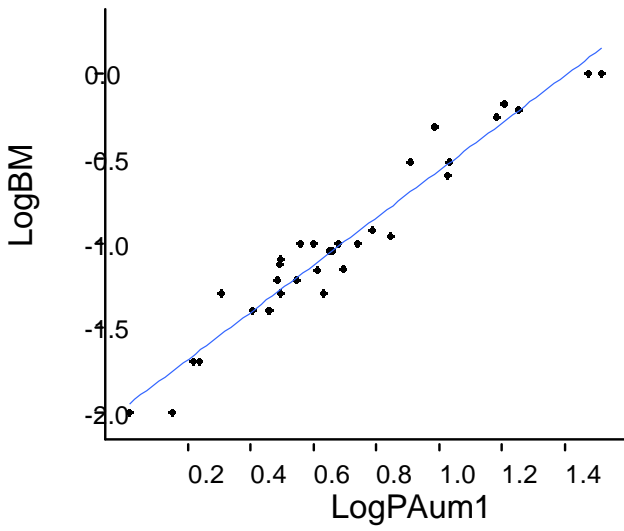

**Fig. S11.** Regression of upper (A) and lower (B) first molar log(planar tooth area) vs log(body mass) for 33 species of murid rodents for estimation of body mass for Ref. (23).

## Tables

**Table S1.** Comparison of models for maximum body mass of terrestrial mammals ( $M^{0.259}$ ) from 70 to 30 Ma using Akaike information criterion (AIC) showing log-likelihood and number of parameters ( $npar$ ) for each model.

| Model       | AIC   | log-likelihood | $npar$ |
|-------------|-------|----------------|--------|
| OLS         | 50.27 | -22.14         | 3      |
| Segmented   | 53.73 | -21.86         | 5      |
| Gompertz    | 52.21 | -22.1          | 4      |
| Square root | 60.7  | -28.35         | 2      |
| Exponential | 53.75 | -23.88         | 3      |
| Logistic    | 52.99 | -22.49         | 4      |

**Table S2.** The maximum body mass for all terrestrial mammals and for several orders increased linearly when generation time is accounted for. Slope for linear regression of  $M^{0.25}$  vs Age (Ma) for each group from their origin until their maximum (except for Cetacea, which is for the period of 31 Ma to the Recent). The average rate in haldanes was calculated using the mammalian scaling relationship of generation time with body mass.

|                     | Slope | Haldanes ( $\times 10^{-6}$ ) | $R^2$ | $P$                   |
|---------------------|-------|-------------------------------|-------|-----------------------|
| Terrestrial maximum | 1.35  | 6.09                          | 0.97  | $1.12 \times 10^{-5}$ |
| Artiodactyla        | 0.63  | 2.84                          | 0.90  | $3.33 \times 10^{-5}$ |
| Carnivora           | 0.57  | 2.54                          | 0.74  | $6.47 \times 10^{-4}$ |
| Cetacea             | 2.71  | 12.20                         | 0.83  | $1.58 \times 10^{-3}$ |
| Perissodactyla      | 1.80  | 8.08                          | 0.98  | $9.04 \times 10^{-3}$ |
| Primates            | 0.35  | 1.55                          | 0.78  | $1.35 \times 10^{-4}$ |
| Proboscidea         | 0.92  | 4.11                          | 0.91  | $6.46 \times 10^{-5}$ |
| Rodentia            | 1.06  | 4.74                          | 0.93  | $1.77 \times 10^{-3}$ |

**Table S3.** Comparison of models for maximum body mass of terrestrial mammals ( $M^{0.25}$ ) from 70 to 30 Ma using Akaike information criterion (AIC) showing log-likelihood and number of parameters ( $npar$ ) for each model.

| Model       | AIC   | log-likelihood | $npar$ |
|-------------|-------|----------------|--------|
| OLS         | 47.61 | -20.8          | 3      |
| Segmented   | 51.21 | -20.61         | 5      |
| Gompertz    | 49.64 | -20.82         | 4      |
| Square root | 57.76 | -26.88         | 2      |
| Exponential | 51.79 | -22.9          | 3      |
| Logistic    | 50.39 | -21.19         | 4      |

**Table S4.** Studies used in reference database of mammalian body size evolutionary rates. Figure, Table and page references refer to the reference in the Reference column unless otherwise noted. M<sub>1</sub>, first lower molar; M<sub>2</sub>, second lower molar; M<sub>3</sub>, third lower molar; M<sup>3</sup>, third upper molar.

| Reference | Taxa                                               | Measure                                                                                                 | Body Mass Estimation                                                                                    | Generation Time                               | Ages/Intervals                                                                            |
|-----------|----------------------------------------------------|---------------------------------------------------------------------------------------------------------|---------------------------------------------------------------------------------------------------------|-----------------------------------------------|-------------------------------------------------------------------------------------------|
| (24)      | <i>Bradypus</i>                                    | Body mass (Table 2)                                                                                     | Estimated in Table 2                                                                                    | 6 years (25)                                  | Estimated divergence of islands given on pp. 3-5                                          |
| (26)      | <i>Merychys</i>                                    | Mean basal length (Table 1)                                                                             | Appendix Table 16.8 BCL (27)                                                                            | Regression from body mass for placentals (12) | One interval estimated at 12 million years on p. 120                                      |
| (28)      | <i>Mus musculus</i>                                | Body mass of males (Table 6)                                                                            | Given in Table 6                                                                                        | Regression from body mass for placentals (12) | Estimated intervals 70 years (Skokholm) and 100 years (May)                               |
| (29)      | <i>Mus musculus</i>                                | Body mass (mean of male and female means) (Table II)                                                    | Given in Table II                                                                                       | Regression from body mass for placentals (12) | One interval of 625 years on p. 76                                                        |
| (30)      | <i>Cantius</i>                                     | Mean ln(M <sub>1</sub> area (ln(M <sub>1</sub> length)+ln(M <sub>1</sub> width)) (Appendix 1)           | Table 3 ln(M <sub>1</sub> area) (31)                                                                    | 1 year (estimated on p. 510)                  | Section level in metres; average sedimentary accumulation rate of 2450 yr/m in Appendix 1 |
| (18)      | <i>Elephas antiquus</i> - <i>Elephas cypriotes</i> | Body mass (p. 479)                                                                                      | <i>E. antiquus</i> estimated at 10,000 kg (20); <i>E. cypriotes</i> estimated at 200 kg (18)            | Regression from body mass for placentals (12) | One interval of 2 million years (see notes above)                                         |
| (32)      | <i>Vulpes vulpes</i>                               | Mean M <sub>1</sub> length (Table II)                                                                   | Table 16.6 Canidae MIL (4)                                                                              | Regression from body mass for placentals (12) | Estimated dates in Table I                                                                |
| (33)      | Equids                                             | Mean M <sub>1</sub> or M <sub>2</sub> length at tooth base (Table 1)                                    | Appendix Table 16.8 Perissodactyls and hyracoids only M <sub>1</sub> length (27)                        | 3 years (11)                                  | Estimated by (11)                                                                         |
| (34)      | <i>Cynomys</i>                                     | Mean M <sub>1</sub> length × width (Table 7.3)                                                          | All mammals M <sub>1</sub> (35)                                                                         | Regression from body mass for placentals (12) | Estimated ages given in Table 7.4                                                         |
| (36)      | Equids                                             | Mean metatarsal length (Supplementary Information)                                                      | Appendix Table 16.7 Equids MT1 (37)                                                                     | Regression from body mass for placentals (12) | Data grouped into 5000 year intervals starting at 37500 yr.b.p                            |
| (38)      | Gazelles                                           | Mean of humerus distal medio-lateral diameter (Fig. 20.1) and mean of M <sub>3</sub> length (Fig. 20.2) | Appendix Table 16.7 Bovids Only H5 (37); Appendix Table 16.9 All selenodonts M <sub>3</sub> length (27) | Regression from body mass for placentals (12) | Average age of time periods given in Fig. 20.1                                            |



|      |                           |                                                                                                              |                                                                                                                                                                 |                                               |                                                                                          |
|------|---------------------------|--------------------------------------------------------------------------------------------------------------|-----------------------------------------------------------------------------------------------------------------------------------------------------------------|-----------------------------------------------|------------------------------------------------------------------------------------------|
| (39) | <i>Crocota crocuta</i>    | Mean $M_1$ (Table 1)                                                                                         | Table 16.6 Total sample MIL (4)                                                                                                                                 | Regression from body mass for placentals (12) | Time periods given on p. 90                                                              |
| (40) | <i>Myotragus</i>          | Body mass (p. 126)                                                                                           | Estimated on p. 126                                                                                                                                             | Regression from body mass for placentals (12) | One interval estimated at 2.8 million years on p. 126                                    |
| (41) | <i>Cosomys primus</i>     | Mean $M_1$ length (Table 1)                                                                                  | Appendix Table 16.11 Cricetine rodents (42)                                                                                                                     | 1/3 year (11)                                 | Elevations given in feet; average sediment accumulation of 1.8 feet per ky(11)           |
| (16) | <i>Cervus elephas</i>     | Body mass (p. 540)                                                                                           | Estimated on p. 540                                                                                                                                             | 2.5 years (11)                                | One interval of 5800 years on p. 541                                                     |
| (19) | <i>Mammuthus</i>          | Body mass (p. 38)                                                                                            | Estimated on p. 38                                                                                                                                              | Regression from body mass for placentals (12) | One interval of 85,000 years on p. 38                                                    |
| (43) | Marsupials                | Mean $M^3$ or $M_3$ length (Tables 67A, 75A, 46A, 67, 62, 47, 44A, 46, 22A, 28A); Table 2 (44); Table 1 (45) | <i>Macropus</i> : Appendix Table 16.12 TURL (27);<br><i>Petrogale</i> Appendix Table 16.12 TLML (27);<br><i>Sarcophilus</i> and <i>Dasyurus</i> Fig. 5 M3L (46) | Regression from body mass for marsupials (12) | One interval estimated at 10,000 years on p. 409                                         |
| (47) | <i>Sigmodon</i>           | Ln Mean $M_1$ length (Fig. 1)                                                                                | Equation 1                                                                                                                                                      | Regression from body mass for placentals (12) | One interval estimated at 3.8 million years from Fig. 1                                  |
| (48) | <i>Bison</i>              | Mean femur rotational length for males and females (Tables 22 and 30)                                        | Appendix Table 16.7 Bovids Only F1 average of males and females (37)                                                                                            | 3 years (11)                                  | Estimate of 1000 year interval between <i>B. a. antiquus</i> and <i>B. b. bison</i> (11) |
| (49) | <i>Apodemus argenteus</i> | Mean anterior-posterior diameter of lower incisor (Table 1)                                                  | Anterior-posterior diameter of lower incisor (Table 3) (50)                                                                                                     | Regression from body mass for placentals (12) | Estimated divergence of island at LGM at 0.021 Ma on p. 1270                             |
| (51) | <i>Apodemus speciosus</i> | Mean anterior-posterior diameter of lower incisor (Table 1)                                                  | Anterior-posterior diameter of lower incisor (Table 3) (50)                                                                                                     | Regression from body mass for placentals(12)  | Estimated divergence of island at LGM at 0.021 Ma on p. 1355                             |
| (52) | Viverravids               | Body mass (Fig. 2)                                                                                           | Estimated in Fig. 2                                                                                                                                             | Estimated in Fig. 2                           | Given in Fig. 2                                                                          |
| (53) | <i>Miniochoerus</i>       | Mean $M^{1-3}$ length (Fig. 2)                                                                               | Appendix Table 16.9 Nonselenodonts $M^{1-3}$ length(27)                                                                                                         | Regression from body mass for placentals (12) | Interpolated from regression of feet and age based on dating of three levels (Fig. 2)    |

|         |                                                |                                                                                                                                                                                                        |                                                                                                                                                            |                                               |                                                          |
|---------|------------------------------------------------|--------------------------------------------------------------------------------------------------------------------------------------------------------------------------------------------------------|------------------------------------------------------------------------------------------------------------------------------------------------------------|-----------------------------------------------|----------------------------------------------------------|
| (23)    | <i>Stephanomys</i>                             | Mean $M^1$ and $M_1$ area (Appendices 1 and 2)                                                                                                                                                         | Mean of regressions of $M^1$ and $M_1$ area from data in Fig. S11 (present paper):<br>$\log(M) = 1.362*(UM1A) - 1.95$ ;<br>$\log(M) = 1.404*(LM1A) - 1.86$ | Regression from body mass for placentals (12) | Intervals read from Fig. 1                               |
| (17)    | <i>Mammuthus primigenius-Elephas falconeri</i> | Body mass (Fig. 9.4)                                                                                                                                                                                   | <i>M. primigenius</i> estimated at 5000 kg (20); <i>E. falconeri</i> estimated at 100 kg in Table 3                                                        | Regression from body mass for placentals (12) | One time interval of 0.5 million years (see notes above) |
| (9)     | <i>Homo sapiens</i>                            | Mean body mass (Table 1)                                                                                                                                                                               | Derived from regression of femoral head and/or stature/bi-iliac breadth (mean taken if both proxies used) in modern and Pleistocene <i>Homo</i> (Fig. 1)   | 14.5 years (54)                               | Ages given in Table 1                                    |
| (55)    | <i>Neotoma</i>                                 | Mean body length (Table 1)                                                                                                                                                                             | Formula in Fig. 4                                                                                                                                          | Regression from body mass for placentals (12) | Times of island isolation given in Table 2               |
| (56-59) | <i>Neotoma</i>                                 | Mean of 10 largest pellets for Atlatl Cave (NM), Bison Alcove (UT), Fishmouth Cave (UT), Lyman Lake (AZ), Pryor Mountains (WY), Rocky Canyon (UT) and Southern Bighorn Mountains, East Pryor (MT), USA | Fig. 3 equation (59)                                                                                                                                       | Estimated at 1 year (F.A. Smith)              | Ages in midden sequences in years                        |
| (60)    | <i>Vulpes vulpes</i>                           | Mean $M_1$ length (Table 2)                                                                                                                                                                            | Table 16.6 Canidae M1L (4)                                                                                                                                 | Regression from body mass for placentals (12) | Ages of periods given on p. 49                           |

**Table S5.** Fossilization slightly reduces the measured evolutionary rates compared to the full dataset. Means and 95% confidence intervals for clade maxima rates for clades and subclades for maximum preservation rate ( $PR = 100\%$ ) and six levels of preservation rate ( $PR = 1.0$  to  $0.005\%$ ). For  $PR < 0.05\%$ , some intervals had no fossils present (percentage of intervals with no fossils preserved  $NFP$ ) and so represent a very poor fossil record.

|                | <i>PR (%)</i> | <b>Mean</b> | <b>2.5%</b> | <b>97.5%</b> | <i>NFP (%)</i> |
|----------------|---------------|-------------|-------------|--------------|----------------|
| Clade rates    | 100           | 0.0639      | -0.0747     | 0.2153       | 0              |
|                | 1.0           | 0.0638      | -0.0768     | 0.2154       | 0              |
|                | 0.5           | 0.0643      | -0.0744     | 0.2117       | 0              |
|                | 0.1           | 0.0643      | -0.0850     | 0.2199       | 0              |
|                | 0.05          | 0.0604      | -0.1811     | 0.2978       | 0              |
|                | 0.01          | 0.0561      | -0.2227     | 0.3431       | 0              |
|                | 0.005         | 0.0400      | -0.3306     | 0.4498       | 0              |
| Subclade rates | 100           | 0.0403      | -0.1026     | 0.1907       | 0              |
|                | 1.0           | 0.0403      | -0.1031     | 0.1918       | 0              |
|                | 0.5           | 0.0406      | -0.1063     | 0.1958       | 0              |
|                | 0.1           | 0.0404      | -0.1141     | 0.2065       | 0              |
|                | 0.05          | 0.0348      | -0.2945     | 0.3490       | 0              |
|                | 0.01          | 0.0261      | -0.4277     | 0.4739       | 4.44           |
|                | 0.005         | 0.0005      | -0.6024     | 0.5245       | 58.89          |

**Table S6.** Maximum body size for terrestrial mammals and nine mammalian orders. Log change (SD) and log interval (generations) are shown for positive changes in body size for each time point compared to the next time point. For Fig. 3, all combinations of time points in a series were compared.

| Order               | Species                                                       | Maximum Mass (Kg) | Age (Ma) | Generation Time (yr) | Log Change (SD) | Log Interval (Gen) |
|---------------------|---------------------------------------------------------------|-------------------|----------|----------------------|-----------------|--------------------|
| Terrestrial mammals |                                                               |                   |          |                      |                 |                    |
| Proboscidea         | <i>Loxodonta africana</i>                                     | 10000             | 0.00005  | 11.345               |                 |                    |
| Proboscidea         | <i>Loxodonta africana</i>                                     | 10000             | 0.005    | 11.345               |                 |                    |
| Proboscidea         | <i>Elephas recki/Mammuthus columbi/Mammuthus trogontherii</i> | 12000             | 0.9035   | 12.602               |                 |                    |
| Proboscidea         | <i>Deinotherium bozasi</i>                                    | 17450             | 2.703    | 13.105               |                 |                    |
| Proboscidea         | <i>Deinotherium bozasi/giganteum</i>                          | 17450             | 4.465    | 13.105               |                 |                    |
| Proboscidea         | <i>Deinotherium bozasi/giganteum</i>                          | 17450             | 8.47     | 13.105               |                 |                    |
| Proboscidea         | <i>Gomphotherium productum</i>                                | 6568              | 13.79    | 10.175               | 0.814           | 5.662              |
| Proboscidea         | <i>Prodeinotherium bavaricum</i>                              | 5917              | 19.5     | 9.904                | -0.157          | 5.755              |
| Perissodactyla      | <i>Indricotherium transouralicum</i>                          | 15000             | 25.715   | 12.602               |                 |                    |
| Perissodactyla      | <i>Indricotherium transouralicum</i>                          | 15000             | 31.15    | 12.602               |                 |                    |
| Perissodactyla      | <i>Brontops dispar</i>                                        | 5907              | 35.55    | 9.899                | 0.793           | 5.594              |
| Dinocerata          | <i>Uintatherium</i> sp.                                       | 4500              | 42.9     | 9.226                | 0.259           | 5.886              |
| Pantodonta          | <i>Coryphodon lobatus</i>                                     | 700               | 52.2     | 5.698                | 1.094           | 6.104              |
| Pantodonta          | <i>Coryphodon lobatus</i>                                     | 700               | 57.25    | 5.698                |                 |                    |
| Condylarthra        | <i>Ectoconus</i> sp.                                          | 54.2              | 60.2     | 2.937                | 1.232           | 5.85               |
| Condylarthra        | <i>Ectoconus</i> sp.                                          | 54.2              | 63.6     | 2.937                |                 |                    |
| Multituberculata    | <i>Meniscoessus robustus</i>                                  | 3.3               | 70.6     | 1.423                | 1.271           | 6.525              |
| Orders              |                                                               |                   |          |                      |                 |                    |
| Artiodactyla        | <i>Hippopotamus amphibius</i>                                 | 2065              | 0.00005  | 6.84                 |                 |                    |
| Artiodactyla        | <i>Hippopotamus amphibius</i>                                 | 2065              | 0.005    | 6.84                 |                 |                    |
| Artiodactyla        | <i>Hippopotamus gorgops</i>                                   | 7255              | 0.9035   | 10.441               |                 |                    |
| Artiodactyla        | <i>Hippopotamus gorgops</i>                                   | 7255              | 2.703    | 10.441               |                 |                    |
| Artiodactyla        | <i>Hippopotamus gorgops</i>                                   | 5114              | 4.465    | 9.536                | 0.368           | 5.247              |
| Artiodactyla        | <i>Megacamelus merriami</i>                                   | 2162              | 8.47     | 7.63                 | 0.759           | 5.671              |
| Artiodactyla        | <i>Megatylopus matthewi</i>                                   | 3005              | 13.79    | 8.31                 |                 |                    |
| Artiodactyla        | <i>Daeodon hollandi</i>                                       | 1519              | 19.5     | 6.964                | 0.658           | 5.875              |
| Artiodactyla        | <i>Daeodon hollandi</i>                                       | 1519              | 25.715   | 6.964                |                 |                    |
| Artiodactyla        | <i>Archaeotherium</i> sp.                                     | 1829              | 31.15    | 7.307                |                 |                    |
| Artiodactyla        | <i>Entelodon</i> sp.                                          | 497               | 35.55    | 5.214                | 0.939           | 5.851              |
| Artiodactyla        | <i>Anthracootherium pangan</i>                                | 365               | 42.9     | 4.813                | 0.313           | 6.166              |
| Artiodactyla        | <i>Bunophorus Bunophorus</i>                                  | 35                | 52.2     | 2.623                | 1.194           | 6.411              |
| Carnivora           | <i>Mirounga leonina</i>                                       | 3692              | 0.00005  | 7.058                |                 |                    |

|                  |                                      |          |         |        |       |       |
|------------------|--------------------------------------|----------|---------|--------|-------|-------|
| Carnivora        | <i>Mirounga leonina</i>              | 3692     | 0.005   | 7.058  |       |       |
| Carnivora        | <i>Odobenus rosmarus</i>             | 1700     | 0.9035  | 7.17   |       |       |
| Carnivora        | <i>Arctodus simus</i>                | 776      | 2.703   | 5.852  | 0.718 | 5.443 |
| Carnivora        | <i>Valenictus chulavistensis</i>     | 1700     | 4.465   | 7.17   |       |       |
| Carnivora        | <i>Pontolis magnus</i>               | 4665     | 8.47    | 9.312  |       |       |
| Carnivora        | <i>Amphicyon ingens</i>              | 400      | 13.79   | 4.929  | 1.214 | 5.888 |
| Carnivora        | <i>Phoberocyon johnhenryi</i>        | 689.3    | 19.5    | 5.675  |       |       |
| Carnivora        | <i>Amphicyon ulungurensis</i>        | 331      | 25.715  | 4.693  | 0.689 | 6.08  |
| Carnivora        | <i>Quercylurus</i> sp.               | 221.6    | 31.15   | 4.23   | 0.427 | 6.086 |
| Carnivora        | <i>Daphoenus lambei</i>              | 4.94     | 35.55   | 1.579  | 1.404 | 6.214 |
| Carnivora        | <i>Procyonodictis vulpiceps</i>      | 1.59     | 42.9    | 1.178  | 0.877 | 6.73  |
| Carnivora        | <i>Didymictis proteus</i>            | 5.3      | 52.2    | 1.608  |       |       |
| Carnivora        | <i>Didymictis proteus</i>            | 5.3      | 57.25   | 1.608  |       |       |
| Carnivora        | <i>Miacoid carnivore</i>             | 10       | 60.2    | 1.896  |       |       |
| Carnivora        | <i>Protictis simpsoni</i>            | 2.61     | 63.6    | 1.339  | 0.952 | 6.327 |
| Cetacea          | <i>Balaenoptera musculus</i>         | 190000   | 0.00005 | 24.323 |       |       |
| Cetacea          | <i>Balaenoptera musculus</i>         | 190000   | 0.005   | 24.323 |       |       |
| Cetacea          | <i>Balaenoptera</i> sp.              | 69540    | 2.703   | 18.748 | 0.826 | 5.1   |
| Cetacea          | <i>Physeter macrocephalus</i>        | 57100    | 4.465   | 17.815 | 0.119 | 4.984 |
| Cetacea          | <i>Mixocetus elysius</i>             | 11476.28 | 8.47    | 11.757 | 1.029 | 5.439 |
| Cetacea          | <i>Pelocetus calvertensis</i>        | 2633.97  | 13.79   | 8.031  | 0.992 | 5.736 |
| Cetacea          | <i>Aglaocetus moreni</i>             | 1487.23  | 19.5    | 6.926  | 0.581 | 5.884 |
| Cetacea          | <i>Micromysticetus tobieni</i>       | 1223.05  | 25.715  | 6.584  | 0.115 | 5.964 |
| Cetacea          | Aetiocetidae USNM314627              | 410.08   | 31.15   | 4.961  | 0.862 | 5.977 |
| Cetacea          | <i>Basilosaurus cetoides</i>         | 4158.8   | 35.55   | 9.039  |       |       |
| Cetacea          | <i>Basilosaurus cetoides</i>         | 4158.8   | 42.9    | 9.039  |       |       |
| Cetacea          | <i>Pakicetus attocki</i>             | 29.7     | 52.2    | 2.513  | 1.518 | 6.261 |
| Creodonta        | <i>Dissopsalis carnifex</i>          | 60       | 8.47    | 3.016  |       |       |
| Creodonta        | <i>Dissopsalis pyroclasticus</i>     | 83       | 13.79   | 3.28   |       |       |
| Creodonta        | <i>Megistotherium osteothalestes</i> | 614      | 19.5    | 5.507  |       |       |
| Creodonta        | <i>Hyaenodon weilini/gigas</i>       | 671      | 25.715  | 5.636  |       |       |
| Creodonta        | <i>Hyaenodon gigas</i>               | 720      | 31.15   | 5.739  |       |       |
| Creodonta        | <i>Hemipsalodon</i> sp.              | 760      | 35.55   | 5.82   |       |       |
| Creodonta        | <i>Patriofelis</i> sp.               | 136.5    | 42.9    | 3.731  | 1.059 | 6.194 |
| Creodonta        | <i>Palaeonictis peloria</i>          | 24.07    | 52.2    | 2.38   | 1.063 | 6.491 |
| Creodonta        | <i>Palaeonictis peloria</i>          | 24.07    | 57.25   | 2.38   |       |       |
| Multituberculata | <i>Neoliotomus ultimus</i>           | 2        | 52.2    | 1.25   |       |       |
| Multituberculata | <i>Sphenopsalis nobilis</i>          | 10       | 57.25   | 1.896  |       |       |
| Multituberculata | <i>Taeniolabis taoensis</i>          | 30       | 63.6    | 2.52   |       |       |
| Multituberculata | <i>Meniscoessus robustus</i>         | 3.3      | 70.6    | 1.423  | 1.168 | 6.562 |

|                |                                                          |       |         |        |        |       |
|----------------|----------------------------------------------------------|-------|---------|--------|--------|-------|
| Perissodactyla | <i>Ceratotherium simum</i>                               | 3600  | 0.00005 | 8.27   |        |       |
| Perissodactyla | <i>Ceratotherium simum</i>                               | 3600  | 0.005   | 8.27   |        |       |
| Perissodactyla | <i>Elasmotherium sibiricum</i>                           | 5000  | 0.9035  | 9.481  |        |       |
| Perissodactyla | <i>Elasmotherium sibiricum</i>                           | 5000  | 2.703   | 9.481  |        |       |
| Perissodactyla | <i>Aphelops mutilus</i>                                  | 4325  | 4.465   | 9.131  | -0.015 | 5.277 |
| Perissodactyla | <i>Iranotherium morgani</i>                              | 3366  | 8.47    | 8.557  | 0.223  | 5.656 |
| Perissodactyla | <i>Teleoceras medicornutum</i>                           | 2965  | 13.79   | 8.281  | -0.073 | 5.801 |
| Perissodactyla | <i>Teleoceras medicornutum</i>                           | 2965  | 19.5    | 8.281  |        |       |
| Perissodactyla | <i>Indricotherium transouralicum</i>                     | 15000 | 25.715  | 12.602 |        |       |
| Perissodactyla | <i>Indricotherium transouralicum</i>                     | 15000 | 31.15   | 12.602 |        |       |
| Perissodactyla | <i>Brontops dispar</i>                                   | 5907  | 35.55   | 9.899  | 0.793  | 5.594 |
| Perissodactyla | <i>Telmatherium altidens</i>                             | 1975  | 42.9    | 7.454  | 0.864  | 5.931 |
| Perissodactyla | <i>Lophiodon rhinoceroideis</i>                          | 280   | 52.2    | 4.494  | 1.115  | 6.201 |
| Primates       | <i>Gorilla beringei graueri</i>                          | 275   | 0.00005 | 4.247  |        |       |
| Primates       | <i>Gorilla beringei graueri</i>                          | 275   | 0.005   | 4.247  |        |       |
| Primates       | <i>Gigantopithecus blacki</i>                            | 500   | 0.9035  | 5.222  |        |       |
| Primates       | <i>Gigantopithecus blacki</i>                            | 500   | 2.703   | 5.222  |        |       |
| Primates       | <i>Theropithecus (Simopithecus) oswaldi</i>              | 96    | 4.465   | 3.406  | 1.041  | 5.618 |
| Primates       | <i>Gigantopithecus blacki</i>                            | 225   | 8.47    | 4.247  |        |       |
| Primates       | <i>Afropithecus turkanensis/Graecopithecus freybergi</i> | 50    | 13.79   | 2.876  | 1.001  | 6.18  |
| Primates       | <i>Afropithecus turkanensis/Proconsul major</i>          | 50    | 19.5    | 2.876  |        |       |
| Primates       | <i>Dolichocebus gaimanensis</i>                          | 2.7   | 25.715  | 1.351  | 1.289  | 6.488 |
| Primates       | <i>Aegyptopithecus zeuxis</i>                            | 7.9   | 31.15   | 1.784  |        |       |
| Primates       | <i>Amphipithecus mogaungensis</i>                        | 8.6   | 35.55   | 1.823  |        |       |
| Primates       | <i>Pondaungia sp.</i>                                    | 9     | 42.9    | 1.845  |        |       |
| Primates       | <i>Pelycodus danielsae</i>                               | 6.3   | 52.2    | 1.682  | 0.376  | 6.722 |
| Primates       | <i>Atiatlasius koulchii</i>                              | 0.1   | 57.25   | 0.575  | 1.441  | 6.69  |
| Proboscidea    | <i>Loxodonta africana</i>                                | 10000 | 0.00005 | 11.345 |        |       |
| Proboscidea    | <i>Loxodonta africana</i>                                | 10000 | 0.005   | 11.345 |        |       |
| Proboscidea    | <i>Mammuthus trogontherii</i>                            | 15000 | 0.9035  | 12.602 |        |       |
| Proboscidea    | <i>Deinotherium bozasi</i>                               | 17450 | 2.703   | 13.105 |        |       |
| Proboscidea    | <i>Deinotherium bozasi/giganteum</i>                     | 17450 | 4.465   | 13.105 |        |       |
| Proboscidea    | <i>Deinotherium bozasi/giganteum</i>                     | 17450 | 8.47    | 13.105 |        |       |
| Proboscidea    | <i>Gomphotherium productum</i>                           | 6568  | 13.79   | 10.175 | 0.814  | 5.662 |
| Proboscidea    | <i>Prodeinotherium bavaricum</i>                         | 5917  | 19.5    | 9.904  | -0.157 | 5.755 |
| Proboscidea    | <i>Palaeomastodon beadnelli</i>                          | 3000  | 25.715  | 8.306  | 0.656  | 5.835 |
| Proboscidea    | <i>Barytherium grave</i>                                 | 3500  | 31.15   | 8.644  |        |       |
| Proboscidea    | <i>Barytherium sp.</i>                                   | 4000  | 35.55   | 8.949  |        |       |

|             |                                  |      |         |       |       |       |
|-------------|----------------------------------|------|---------|-------|-------|-------|
| Proboscidea | <i>Numidotherium koholense</i>   | 558  | 42.9    | 5.373 | 1.118 | 6.021 |
| Proboscidea | <i>Daouitherium rebouli</i>      | 364  | 52.2    | 4.81  | 0.455 | 6.262 |
| Proboscidea | <i>Phosphatherium</i> sp.        | 15   | 57.25   | 2.106 | 1.328 | 6.188 |
| Rodentia    | <i>Hydrochoerus hydrochaeris</i> | 91   | 0.00005 | 3.016 |       |       |
| Rodentia    | <i>Hydrochoerus hydrochaeris</i> | 91   | 0.005   | 3.016 |       |       |
| Rodentia    | <i>Castoroides ohioensis</i>     | 220  | 0.9035  | 4.222 |       |       |
| Rodentia    | <i>Josephoartigasia monesi</i>   | 1211 | 2.703   | 6.567 |       |       |
| Rodentia    | <i>Josephoartigasia monesi</i>   | 1211 | 4.465   | 6.567 |       |       |
| Rodentia    | <i>Phoberomys insolita</i>       | 800  | 8.47    | 5.898 | 0.442 | 5.808 |
| Rodentia    | <i>Phoberomys insolita</i>       | 800  | 13.79   | 5.898 |       |       |
| Rodentia    | <i>Neoreomys</i> sp.             | 3.7  | 25.715  | 1.465 |       |       |
| Rodentia    | Dasyproctidae                    | 1.54 | 31.15   | 1.167 | 0.768 | 6.618 |

---

**Table S7.** Maximum body mass for North American artiodactyls and 18 families. Log change (SD) and log interval (generations) are shown for positive changes in body size for each time point compared to the next time point. For Fig. 3, all combinations of time points in a series were compared.

| Family            | Species                        | Maximum Mass (Kg) | Age (Ma) | Generation Time (yr) | Log Change (SD) | Log Interval (Gen) |
|-------------------|--------------------------------|-------------------|----------|----------------------|-----------------|--------------------|
| Camelidae         | <i>Camelops hesternus</i>      | 1100              | 0.125    | 6.405                |                 |                    |
| Camelidae         | <i>Gigantocamelus spatulus</i> | 3674              | 0.875    | 8.754                |                 |                    |
| Camelidae         | <i>Gigantocamelus spatulus</i> | 3674              | 2        | 8.754                |                 |                    |
| Camelidae         | <i>Gigantocamelus spatulus</i> | 3674              | 3.625    | 8.754                |                 |                    |
| Camelidae         | <i>Megacamelus merriami</i>    | 2162              | 5.25     | 7.63                 | 0.548           | 5.298              |
| Camelidae         | <i>Megatylopus matthewi</i>    | 3005              | 6.125    | 8.31                 |                 |                    |
| Camelidae         | <i>Megatylopus gigas</i>       | 1486              | 7        | 6.924                | 0.672           | 5.061              |
| Camelidae         | <i>Megatylopus gigas</i>       | 1486              | 8.25     | 6.924                |                 |                    |
| Camelidae         | <i>Megatylopus primaevus</i>   | 1400              | 9.5      | 6.818                | -0.401          | 5.26               |
| Camelidae         | <i>Megatylopus</i> sp.         | 1400              | 11.25    | 6.818                |                 |                    |
| Camelidae         | <i>Megatylopus</i> sp.         | 1400              | 13.05    | 6.818                |                 |                    |
| Camelidae         | <i>Aepycamelus robustus</i>    | 446               | 14.3     | 5.07                 | 0.882           | 5.326              |
| Camelidae         | <i>Procamelus leptocolon</i>   | 500               | 15.5     | 5.222                |                 |                    |
| Camelidae         | <i>Aepycamelus procerus</i>    | 488               | 16.75    | 5.189                | -0.791          | 5.38               |
| Entelodontidae    | <i>Daeodon hollandi</i>        | 1519              | 18       | 6.964                |                 |                    |
| Entelodontidae    | <i>Daeodon hollandi</i>        | 1519              | 19       | 6.964                |                 |                    |
| Entelodontidae    | <i>Daeodon hollandi</i>        | 1519              | 21.25    | 6.964                |                 |                    |
| Entelodontidae    | <i>Daeodon hollandi</i>        | 1519              | 25.445   | 6.964                |                 |                    |
| Entelodontidae    | <i>Daeodon hollandi</i>        | 1519              | 28.82    | 6.964                |                 |                    |
| Entelodontidae    | <i>Megachoerus latidens</i>    | 1829              | 31       | 7.307                |                 |                    |
| Entelodontidae    | <i>Megachoerus latidens</i>    | 1829              | 32.85    | 7.307                |                 |                    |
| Entelodontidae    | <i>Megachoerus latidens</i>    | 1829              | 34.2     | 7.307                |                 |                    |
| Entelodontidae    | <i>Megachoerus latidens</i>    | 1829              | 35.2     | 7.307                |                 |                    |
| Anthracotheriidae | <i>Bothriodon advena</i>       | 306.89            | 36.985   | 4.602                | 1.076           | 5.484              |
| Entelodontidae    | <i>Archaeotherium mortoni</i>  | 134               | 38.8     | 3.713                | 0.742           | 5.642              |
| Entelodontidae    | <i>Brachyhyops uintensis</i>   | 46                | 41.96    | 2.815                | 0.853           | 5.989              |
| Helohyidae        | <i>Achaenodon robustus</i>     | 191               | 45.04    | 4.07                 |                 |                    |
| Helohyidae        | <i>Helohyus milleri</i>        | 21.55             | 46.605   | 2.313                | 1.163           | 5.702              |
| Helohyidae        | <i>Helohyus milleri</i>        | 21.55             | 47.98    | 2.313                |                 |                    |
| Helohyidae        | <i>Helohyus milleri</i>        | 21.55             | 50.39    | 2.313                |                 |                    |
| Diacodexidae      | <i>Bunophorus grangeri</i>     | 9.17              | 52.05    | 1.854                | 0.756           | 5.903              |
| Diacodexidae      | <i>Bunophorus grangeri</i>     | 9.17              | 52.58    | 1.854                |                 |                    |
| Diacodexidae      | <i>Bunophorus grangeri</i>     | 9.17              | 53.125   | 1.854                |                 |                    |
| Diacodexidae      | <i>Diacodexis ilicis</i>       | 1.33              | 54.155   | 1.124                | 1.11            | 5.849              |



|                   |                                     |        |        |       |       |       |
|-------------------|-------------------------------------|--------|--------|-------|-------|-------|
| Anthracotheriidae | <i>Arretotherium acridens</i>       | 191.77 | 18     | 4.074 |       |       |
| Anthracotheriidae | <i>Arretotherium acridens</i>       | 191.77 | 19     | 4.074 |       |       |
| Anthracotheriidae | <i>Arretotherium acridens</i>       | 191.77 | 21.25  | 4.074 |       |       |
| Anthracotheriidae | <i>Elomeryx</i> sp.                 | 326.3  | 25.445 | 4.676 |       |       |
| Anthracotheriidae | <i>Kukusepasutanka schultzi</i>     | 344.59 | 28.82  | 4.742 |       |       |
| Anthracotheriidae | <i>Elomeryx armatus</i>             | 158.42 | 31     | 3.878 | 0.714 | 5.705 |
| Anthracotheriidae | <i>Bothriodon americanus</i>        | 281.3  | 34.2   | 4.499 |       |       |
| Anthracotheriidae | <i>Bothriodon americanus</i>        | 281.3  | 35.2   | 4.499 |       |       |
| Anthracotheriidae | <i>Bothriodon advena</i>            | 306.89 | 36.985 | 4.602 |       |       |
| Anthracotheriidae | <i>Heptacodon pellionis</i>         | 75.72  | 38.8   | 3.203 | 0.97  | 5.672 |
| Antilocapridae    | <i>Tetrameryx shuleri</i>           | 64.65  | 0.125  | 3.074 |       |       |
| Antilocapridae    | <i>Tetrameryx shuleri</i>           | 64.65  | 0.875  | 3.074 |       |       |
| Antilocapridae    | <i>Tetrameryx</i> sp.               | 64.65  | 2      | 3.074 |       |       |
| Antilocapridae    | <i>Tetrameryx</i> sp.               | 64.65  | 3.625  | 3.074 |       |       |
| Antilocapridae    | <i>Hexameryx simpsoni</i>           | 30.65  | 5.25   | 2.534 | 0.697 | 5.764 |
| Antilocapridae    | <i>Hexameryx simpsoni</i>           | 30.65  | 7      | 2.534 |       |       |
| Antilocapridae    | <i>Ilingoceros</i> sp.              | 49.85  | 8.25   | 2.874 |       |       |
| Antilocapridae    | <i>Plioceros</i> sp.                | 17.76  | 9.5    | 2.2   | 0.838 | 5.695 |
| Antilocapridae    | <i>Plioceros</i> sp.                | 17.76  | 11.25  | 2.2   |       |       |
| Antilocapridae    | <i>Ramoceros osborni</i>            | 22.13  | 13.05  | 2.329 |       |       |
| Antilocapridae    | <i>Ramoceros ramosus</i>            | 22.13  | 14.3   | 2.329 |       |       |
| Antilocapridae    | <i>Ramoceros ramosus</i>            | 22.13  | 15.5   | 2.329 |       |       |
| Antilocapridae    | <i>Merriamoceros</i> sp.            | 14.91  | 16.75  | 2.103 | 0.42  | 5.752 |
| Antilocapridae    | <i>Merycodus sabulornis</i>         | 10.18  | 18     | 1.905 | 0.406 | 5.795 |
| Diacodexidae      | <i>Tapochoerus egressus</i>         | 8.74   | 41.96  | 1.831 |       |       |
| Diacodexidae      | <i>Tapochoerus mcmillini</i>        | 4.29   | 45.04  | 1.523 | 0.676 | 6.265 |
| Diacodexidae      | <i>Neodiacodexis emryi</i>          | 5.1    | 46.605 | 1.592 |       |       |
| Diacodexidae      | <i>Bunophorus pattersoni</i>        | 3.77   | 47.98  | 1.473 | 0.304 | 5.953 |
| Diacodexidae      | <i>Bunophorus sinclairi</i>         | 8.92   | 50.39  | 1.841 |       |       |
| Diacodexidae      | <i>Bunophorus grangeri</i>          | 9.17   | 52.05  | 1.854 |       |       |
| Diacodexidae      | <i>Bunophorus grangeri</i>          | 9.17   | 52.58  | 1.854 |       |       |
| Diacodexidae      | <i>Bunophorus grangeri</i>          | 9.17   | 53.125 | 1.854 |       |       |
| Diacodexidae      | <i>Diacodexis ilicis</i>            | 1.33   | 54.155 | 1.124 | 1.11  | 5.849 |
| Helohyidae        | <i>Dyscritochoerus lapointensis</i> | 29.05  | 38.8   | 2.499 |       |       |
| Helohyidae        | <i>Achaenodon robustus</i>          | 191    | 45.04  | 4.07  |       |       |
| Helohyidae        | <i>Helohyus milleri</i>             | 21.55  | 46.605 | 2.313 | 1.163 | 5.702 |
| Helohyidae        | <i>Helohyus milleri</i>             | 21.55  | 47.98  | 2.313 |       |       |
| Helohyidae        | <i>Helohyus milleri</i>             | 21.55  | 50.39  | 2.313 |       |       |
| Homacodontidae    | <i>Pentacemylus progressus</i>      | 5.79   | 38.8   | 1.646 |       |       |

|                   |                                                     |        |        |       |        |       |
|-------------------|-----------------------------------------------------|--------|--------|-------|--------|-------|
| Homacodontidae    | <i>Pentacemylus leotensis</i>                       | 6.85   | 41.96  | 1.719 |        |       |
| Homacodontidae    | <i>Auxontodon</i> sp.                               | 5.63   | 45.04  | 1.634 | 0.116  | 6.264 |
| Homacodontidae    | <i>Homacodon</i> n. sp. A                           | 3.25   | 46.605 | 1.417 | 0.564  | 6.012 |
| Homacodontidae    | <i>Homacodon</i> n. sp. A                           | 3.25   | 47.98  | 1.417 |        |       |
| Homacodontidae    | <i>Antiacodon vanvaleni</i>                         | 2.1    | 50.39  | 1.266 | 0.464  | 6.255 |
| Homacodontidae    | <i>Antiacodon vanvaleni</i>                         | 2.1    | 52.05  | 1.266 |        |       |
| Homacodontidae    | <i>Hexacodus pelodes</i>                            | 1.83   | 52.58  | 1.221 | -0.037 | 5.63  |
| Homacodontidae    | <i>Hexacodus pelodes</i>                            | 1.83   | 53.125 | 1.221 |        |       |
| Merycoidodontidae | <i>Merychys</i> sp.                                 | 79.16  | 7      | 3.24  |        |       |
| Merycoidodontidae | <i>Merychys major</i>                               | 79.16  | 8.25   | 3.24  |        |       |
| Merycoidodontidae | <i>Merychys novomexicanus</i>                       | 119.76 | 9.5    | 3.607 |        |       |
| Merycoidodontidae | <i>Merychys novomexicanus</i>                       | 119.76 | 11.25  | 3.607 |        |       |
| Merycoidodontidae | <i>Merychys novomexicanus</i>                       | 119.76 | 13.05  | 3.607 |        |       |
| Merycoidodontidae | <i>Brachycrus siouense</i>                          | 98     | 14.3   | 3.424 | 0.126  | 5.551 |
| Merycoidodontidae | <i>Brachycrus laticeps</i>                          | 248.61 | 15.5   | 4.358 |        |       |
| Merycoidodontidae | <i>Brachycrus laticeps</i>                          | 248.61 | 16.75  | 4.358 |        |       |
| Merycoidodontidae | <i>Merycochoerus magnus</i>                         | 325.53 | 18     | 4.673 |        |       |
| Merycoidodontidae | <i>Merycochoerus</i> sp.                            | 252.51 | 19     | 4.375 | 0.229  | 5.345 |
| Merycoidodontidae | <i>Merycochoerus</i> sp.                            | 252.51 | 21.25  | 4.375 |        |       |
| Merycoidodontidae | <i>Merycochoerus pinensis</i>                       | 252.51 | 25.445 | 4.375 |        |       |
| Merycoidodontidae | <i>Merycochoerus pinensis</i>                       | 252.51 | 28.82  | 4.375 |        |       |
| Merycoidodontidae | <i>Eporeodon occidentalis</i>                       | 63.01  | 31     | 3.054 | 0.966  | 5.773 |
| Merycoidodontidae | <i>Merycoidodon culbertsoni/Oreodon macrorhinus</i> | 46.84  | 32.85  | 2.828 | 0.296  | 5.799 |
| Merycoidodontidae | <i>Merycoidodon culbertsoni/Oreodon macrorhinus</i> | 46.84  | 34.2   | 2.828 |        |       |
| Merycoidodontidae | <i>Merycoidodon culbertsoni/Oreodon macrorhinus</i> | 46.84  | 35.2   | 2.828 |        |       |
| Merycoidodontidae | <i>Merycoidodon culbertsoni/Oreodon macrorhinus</i> | 46.84  | 36.985 | 2.828 |        |       |
| Merycoidodontidae | <i>Merycoidodon culbertsoni/Oreodon macrorhinus</i> | 46.84  | 38.8   | 2.828 |        |       |
| Agriochoceridae   | <i>Agriochoerus</i> sp.                             | 43.31  | 25.445 | 2.771 |        |       |
| Agriochoceridae   | <i>Agriochoerus gaudryi</i>                         | 43.31  | 28.82  | 2.771 |        |       |
| Agriochoceridae   | <i>Agriochoerus guyotianus</i>                      | 23.84  | 31     | 2.374 | 0.6    | 5.929 |
| Agriochoceridae   | <i>Agriochoerus antiquus</i>                        | 43.31  | 32.85  | 2.771 |        |       |
| Agriochoceridae   | <i>Agriochoerus maximus</i>                         | 43.31  | 34.2   | 2.771 |        |       |
| Agriochoceridae   | <i>Agriochoerus maximus</i>                         | 43.31  | 35.2   | 2.771 |        |       |
| Agriochoceridae   | <i>Agriochoerus maximus</i>                         | 43.31  | 36.985 | 2.771 |        |       |
| Agriochoceridae   | <i>Agriochoerus maximus</i>                         | 43.31  | 38.8   | 2.771 |        |       |
| Agriochoceridae   | <i>Protoreodon pearcei</i>                          | 27.53  | 41.96  | 2.464 | 0.48   | 6.082 |
| Agriochoceridae   | <i>Protoreodon pumilus</i>                          | 15.54  | 45.04  | 2.125 | 0.581  | 6.129 |
| Agriochoceridae   | <i>Protoreodon</i> sp.                              | 10.74  | 46.605 | 1.931 | 0.391  | 5.888 |

|                |                                        |        |        |       |        |       |
|----------------|----------------------------------------|--------|--------|-------|--------|-------|
| Dromomerycidae | <i>Pediomeryx hemphillensis</i>        | 145.19 | 5.25   | 3.791 |        |       |
| Dromomerycidae | <i>Pediomeryx hemphillensis</i>        | 145.19 | 6.125  | 3.791 |        |       |
| Dromomerycidae | <i>Pediomeryx(Yumaceras) figginsi</i>  | 233.43 | 7      | 4.287 |        |       |
| Dromomerycidae | <i>Pediomeryx(Yumaceras) hamiltoni</i> | 233.43 | 8.25   | 4.287 |        |       |
| Dromomerycidae | <i>Cranioceras unicornis</i>           | 128.86 | 9.5    | 3.676 | 0.598  | 5.498 |
| Dromomerycidae | <i>Cranioceras unicornis</i>           | 128.86 | 11.25  | 3.676 |        |       |
| Dromomerycidae | <i>Dromomeryx borealis</i>             | 205.03 | 13.05  | 4.146 |        |       |
| Dromomerycidae | <i>Dromomeryx borealis</i>             | 205.03 | 14.3   | 4.146 |        |       |
| Dromomerycidae | <i>Dromomeryx whitfordi</i>            | 132.81 | 15.5   | 3.705 | 0.462  | 5.486 |
| Gelocidae      | <i>Pseudoceras</i> sp.                 | 6.34   | 7      | 1.685 |        |       |
| Gelocidae      | <i>Pseudoceras</i> sp.                 | 6.34   | 8.25   | 1.685 |        |       |
| Gelocidae      | <i>Pseudoceras skinneri</i>            | 1.37   | 9.5    | 1.133 | 1.009  | 5.954 |
| Gelocidae      | <i>Pseudoceras</i> sp.                 | 6.34   | 11.25  | 1.685 |        |       |
| Gelocidae      | <i>Pseudoceras</i> sp.                 | 6.34   | 13.05  | 1.685 |        |       |
| Leptochoeridae | <i>Leptochoerus</i> sp.                | 3.9    | 25.445 | 1.486 |        |       |
| Leptochoeridae | <i>Leptochoerus</i> sp.                | 3.9    | 28.82  | 1.486 |        |       |
| Leptochoeridae | <i>Leptochoerus</i> sp.                | 3.9    | 31     | 1.486 |        |       |
| Leptochoeridae | <i>Leptochoerus</i> sp.                | 3.9    | 32.85  | 1.486 |        |       |
| Leptochoeridae | <i>Leptochoerus</i> sp.                | 3.9    | 34.2   | 1.486 |        |       |
| Leptochoeridae | <i>Leptochoerus</i> sp.                | 3.9    | 35.2   | 1.486 |        |       |
| Leptochoeridae | <i>Stibarus yoderensis</i>             | 2.85   | 36.985 | 1.37  | 0.32   | 6.097 |
| Leptochoeridae | <i>Ibarus ignotus</i>                  | 2.24   | 41.96  | 1.287 | 0.206  | 6.574 |
| Leptochoeridae | <i>"Diacodexis" woltonensis</i>        | 1.76   | 45.04  | 1.209 | 0.206  | 6.393 |
| Leptochoeridae | <i>"Diacodexis" woltonensis</i>        | 1.76   | 46.605 | 1.209 |        |       |
| Leptochoeridae | <i>"Diacodexis" woltonensis</i>        | 1.76   | 47.98  | 1.209 |        |       |
| Leptochoeridae | <i>"Diacodexis" woltonensis</i>        | 1.76   | 50.39  | 1.209 |        |       |
| Leptochoeridae | <i>"Diacodexis" woltonensis</i>        | 1.76   | 52.05  | 1.209 |        |       |
| Moschidae      | <i>Parablastomeryx gregoryi</i>        | 17.76  | 9.5    | 2.2   |        |       |
| Moschidae      | <i>Longirostromeryx wellsi</i>         | 13.06  | 11.25  | 2.032 | 0.312  | 5.918 |
| Moschidae      | <i>Longirostromeryx wellsi</i>         | 13.06  | 13.05  | 2.032 |        |       |
| Moschidae      | <i>Blastomeryx elegans</i>             | 11.62  | 14.3   | 1.971 | -0.109 | 5.796 |
| Moschidae      | <i>Blastomeryx elegans</i>             | 11.62  | 15.5   | 1.971 |        |       |
| Moschidae      | <i>Parablastomeryx</i> sp.             | 15.15  | 16.75  | 2.111 |        |       |
| Moschidae      | <i>Parablastomeryx galushi</i>         | 15.15  | 18     | 2.111 |        |       |
| Moschidae      | <i>Blastomeryx</i> sp.                 | 7.39   | 19     | 1.753 | 0.68   | 5.715 |
| Moschidae      | <i>Blastomeryx elegans</i>             | 11.62  | 21.25  | 1.971 |        |       |
| Oromerycidae   | <i>Eotylopus reedi</i>                 | 23.57  | 34.2   | 2.367 |        |       |
| Oromerycidae   | <i>Eotylopus reedi</i>                 | 23.57  | 35.2   | 2.367 |        |       |

|                |                                     |        |        |       |        |       |
|----------------|-------------------------------------|--------|--------|-------|--------|-------|
| Oromerycidae   | <i>Montanatylopus matthewi</i>      | 79.16  | 36.985 | 3.24  |        |       |
| Oromerycidae   | <i>Eotylopus reedi</i>              | 23.57  | 38.8   | 2.367 | 0.907  | 5.815 |
| Oromerycidae   | <i>Eotylopus reedi</i>              | 23.57  | 41.96  | 2.367 |        |       |
| Oromerycidae   | <i>Protilyopus petersoni</i>        | 5.13   | 45.04  | 1.595 | 1.007  | 6.197 |
| Protoceratidae | <i>Kyptoceras amatorum</i>          | 300.35 | 5.25   | 4.576 |        |       |
| Protoceratidae | <i>Synthetoceras tricornatus</i>    | 211.19 | 8.25   | 4.177 | 0.371  | 5.836 |
| Protoceratidae | <i>Synthetoceras tricornatus</i>    | 211.19 | 9.5    | 4.177 |        |       |
| Protoceratidae | <i>Synthetoceras tricornatus</i>    | 211.19 | 11.25  | 4.177 |        |       |
| Protoceratidae | <i>Lambdoceras trinitensis</i>      | 154.77 | 13.05  | 3.854 | 0.316  | 5.652 |
| Protoceratidae | <i>Prosynthetoceras</i> sp.         | 51.86  | 14.3   | 2.904 | 0.863  | 5.571 |
| Protoceratidae | <i>Lambdoceras siouxensis</i>       | 163    | 15.5   | 3.906 |        |       |
| Protoceratidae | <i>Lambdoceras hessei</i>           | 98     | 16.75  | 3.424 | 0.53   | 5.533 |
| Protoceratidae | <i>Prosynthetoceras texanus</i>     | 49.31  | 18     | 2.866 | 0.661  | 5.6   |
| Protoceratidae | <i>Prosynthetoceras texanus</i>     | 49.31  | 19     | 2.866 |        |       |
| Protoceratidae | <i>Syndyoceras cooki</i>            | 73.3   | 21.25  | 3.176 |        |       |
| Protoceratidae | <i>Protoceras</i> sp.               | 43.31  | 25.445 | 2.771 | 0.545  | 6.15  |
| Protoceratidae | <i>Protoceras skinneri</i>          | 43.31  | 28.82  | 2.771 |        |       |
| Protoceratidae | <i>Protoceras celer</i>             | 43.31  | 31     | 2.771 |        |       |
| Protoceratidae | <i>Pseudoprotoceras longinaris</i>  | 12.23  | 34.2   | 1.997 | 0.926  | 6.132 |
| Protoceratidae | <i>Poabromylus taylori</i>          | 31.58  | 35.2   | 2.554 |        |       |
| Protoceratidae | <i>Pseudoprotoceras semicinctus</i> | 31.93  | 36.985 | 2.561 |        |       |
| Protoceratidae | <i>Heteromeryx dispar</i>           | 22.83  | 38.8   | 2.348 | 0.35   | 5.869 |
| Protoceratidae | <i>Heteromeryx dispar</i>           | 22.83  | 41.96  | 2.348 |        |       |
| Protoceratidae | <i>Leptoreodon major</i>            | 9.9    | 45.04  | 1.891 | 0.746  | 6.164 |
| Tayassuidae    | <i>Mylohyus fossilis</i>            | 67.97  | 0.125  | 3.115 |        |       |
| Tayassuidae    | <i>Mylohyus fossilis</i>            | 67.97  | 0.875  | 3.115 |        |       |
| Tayassuidae    | <i>Platygonus pearcei</i>           | 83.68  | 2      | 3.287 |        |       |
| Tayassuidae    | <i>Catagonus brachydontus</i>       | 105.33 | 3.625  | 3.489 |        |       |
| Tayassuidae    | <i>Catagonus brachydontus</i>       | 105.33 | 5.25   | 3.489 |        |       |
| Tayassuidae    | <i>Catagonus brachydontus</i>       | 105.33 | 6.125  | 3.489 |        |       |
| Tayassuidae    | <i>Prosthennops serus</i>           | 64.09  | 7      | 3.067 | 0.52   | 5.427 |
| Tayassuidae    | <i>Prosthennops serus</i>           | 64.09  | 8.25   | 3.067 |        |       |
| Tayassuidae    | <i>"Prosthennops" niobrarensis</i>  | 46.86  | 9.5    | 2.829 | 0.32   | 5.628 |
| Tayassuidae    | <i>Prosthennops serus</i>           | 64.09  | 11.25  | 3.067 |        |       |
| Tayassuidae    | <i>Hesperhys</i> sp.                | 110.19 | 13.05  | 3.53  |        |       |
| Tayassuidae    | <i>Hesperhys</i> sp.                | 110.19 | 14.3   | 3.53  |        |       |
| Tayassuidae    | <i>Hesperhys vagrans</i>            | 115.18 | 15.5   | 3.57  |        |       |
| Tayassuidae    | <i>Hesperhys vagrans</i>            | 115.18 | 16.75  | 3.57  |        |       |
| Tayassuidae    | <i>Hesperhys pinensis</i>           | 105.33 | 18     | 3.489 | -0.225 | 5.549 |
| Tayassuidae    | <i>Hesperhys pinensis</i>           | 105.33 | 19     | 3.489 |        |       |
| Tayassuidae    | <i>Thinohyus lentus</i>             | 51.02  | 28.82  | 2.892 | 0.684  | 6.49  |

|                |                                          |       |        |       |        |       |
|----------------|------------------------------------------|-------|--------|-------|--------|-------|
| Tayassuidae    | <i>Thinohyus lentus</i>                  | 51.02 | 31     | 2.892 |        |       |
| Tayassuidae    | <i>Thinohyus lentus</i>                  | 51.02 | 32.85  | 2.892 |        |       |
| Entelodontidae | <i>Daeodon hollandi</i>                  | 1519  | 18     | 6.964 |        |       |
| Entelodontidae | <i>Daeodon hollandi</i>                  | 1519  | 19     | 6.964 |        |       |
| Entelodontidae | <i>Daeodon hollandi</i>                  | 1519  | 21.25  | 6.964 |        |       |
| Entelodontidae | <i>Daeodon hollandi</i>                  | 1519  | 25.445 | 6.964 |        |       |
| Entelodontidae | <i>Daeodon hollandi</i>                  | 1519  | 28.82  | 6.964 |        |       |
| Entelodontidae | <i>Megachoerus latidens</i>              | 1829  | 31     | 7.307 |        |       |
| Entelodontidae | <i>Megachoerus latidens</i>              | 1829  | 32.85  | 7.307 |        |       |
| Entelodontidae | <i>Megachoerus latidens</i>              | 1829  | 34.2   | 7.307 |        |       |
| Entelodontidae | <i>Megachoerus latidens</i>              | 1829  | 35.2   | 7.307 |        |       |
| Entelodontidae | <i>Archaeotherium mortoni</i>            | 134   | 36.985 | 3.713 | 1.241  | 5.527 |
| Entelodontidae | <i>Archaeotherium mortoni</i>            | 134   | 38.8   | 3.713 |        |       |
| Entelodontidae | <i>Brachyhyops uintensis</i>             | 46    | 41.96  | 2.815 | 0.853  | 5.989 |
| Entelodontidae | <i>Brachyhyops uintensis</i>             | 46    | 45.04  | 2.815 |        |       |
| Leptomerycidae | <i>Pseudoparablastomeryx francescita</i> | 3.82  | 13.05  | 1.478 |        |       |
| Leptomerycidae | <i>Pseudoparablastomeryx scotti</i>      | 4.78  | 14.3   | 1.566 |        |       |
| Leptomerycidae | <i>Pseudoparablastomeryx scotti</i>      | 4.78  | 15.5   | 1.566 |        |       |
| Leptomerycidae | <i>Pseudoparablastomeryx scotti</i>      | 4.78  | 16.75  | 1.566 |        |       |
| Leptomerycidae | <i>Leptomeryx</i> sp.                    | 6.7   | 18     | 1.709 |        |       |
| Leptomerycidae | <i>Pronodens silberlingi</i>             | 13.06 | 19     | 2.032 |        |       |
| Leptomerycidae | <i>Pronodens silberlingi</i>             | 13.06 | 21.25  | 2.032 |        |       |
| Leptomerycidae | <i>Pronodens silberlingi</i>             | 13.06 | 25.445 | 2.032 |        |       |
| Leptomerycidae | <i>Pronodens silberlingi</i>             | 13.06 | 28.82  | 2.032 |        |       |
| Leptomerycidae | <i>Leptomeryx evansi</i>                 | 3.99  | 31     | 1.494 | 0.898  | 6.096 |
| Leptomerycidae | <i>Leptomeryx evansi</i>                 | 3.99  | 32.85  | 1.494 |        |       |
| Leptomerycidae | <i>Leptomeryx mammifer</i>               | 11.63 | 34.2   | 1.972 |        |       |
| Leptomerycidae | <i>Leptomeryx mammifer</i>               | 11.63 | 35.2   | 1.972 |        |       |
| Leptomerycidae | <i>Leptomeryx mammifer</i>               | 11.63 | 36.985 | 1.972 |        |       |
| Leptomerycidae | <i>Leptomeryx yoderi</i>                 | 6.39  | 38.8   | 1.688 | 0.601  | 5.997 |
| Leptomerycidae | <i>Leptomeryx</i> sp.                    | 6.7   | 41.96  | 1.709 |        |       |
| Camelidae      | <i>Camelops hesternus</i>                | 1100  | 0.125  | 6.405 |        |       |
| Camelidae      | <i>Gigantocamelus spatulus</i>           | 3674  | 0.875  | 8.754 |        |       |
| Camelidae      | <i>Gigantocamelus spatulus</i>           | 3674  | 2      | 8.754 |        |       |
| Camelidae      | <i>Gigantocamelus spatulus</i>           | 3674  | 3.625  | 8.754 |        |       |
| Camelidae      | <i>Megacamelus merriami</i>              | 2162  | 5.25   | 7.63  | 0.548  | 5.298 |
| Camelidae      | <i>Megatylopus matthewi</i>              | 3005  | 6.125  | 8.31  |        |       |
| Camelidae      | <i>Megatylopus gigas</i>                 | 1486  | 7      | 6.924 | 0.672  | 5.061 |
| Camelidae      | <i>Megatylopus gigas</i>                 | 1486  | 8.25   | 6.924 |        |       |
| Camelidae      | <i>Megatylopus primaevus</i>             | 1400  | 9.5    | 6.818 | -0.433 | 5.228 |

|                 |                                  |        |        |       |        |       |
|-----------------|----------------------------------|--------|--------|-------|--------|-------|
| Camelidae       | <i>Megatylopus</i> sp.           | 1400   | 11.25  | 6.818 | -1.545 |       |
| Camelidae       | <i>Megatylopus</i> sp.           | 1400   | 13.05  | 6.818 |        |       |
| Camelidae       | <i>Aepycamelus robustus</i>      | 446    | 14.3   | 5.07  | 0.882  | 5.326 |
| Camelidae       | <i>Procamelus leptocolon</i>     | 500    | 15.5   | 5.222 |        |       |
| Camelidae       | <i>Aepycamelus procerus</i>      | 488    | 16.75  | 5.189 | -0.791 | 5.38  |
| Camelidae       | <i>Protolabis</i> sp.            | 176.06 | 18     | 3.985 | 0.832  | 5.438 |
| Camelidae       | <i>Protolabis</i> sp.            | 176.06 | 19     | 3.985 |        |       |
| Camelidae       | <i>Stenomylus hitchcocki</i>     | 58.65  | 21.25  | 2.998 | 0.865  | 5.812 |
| Camelidae       | <i>Pseudolabis dakotensis</i>    | 50.57  | 25.445 | 2.885 | -0.005 | 6.154 |
| Camelidae       | <i>Pseudolabis dakotensis</i>    | 50.57  | 28.82  | 2.885 |        |       |
| Camelidae       | <i>Pseudolabis dakotensis</i>    | 50.57  | 31     | 2.885 |        |       |
| Camelidae       | <i>Paratylopus labiatus</i>      | 34.8   | 32.85  | 2.619 | 0.396  | 5.828 |
| Camelidae       | <i>Poebrotherium</i> sp.         | 23.57  | 34.2   | 2.367 | 0.415  | 5.734 |
| Camelidae       | <i>Poebrotherium</i> sp.         | 23.57  | 35.2   | 2.367 |        |       |
| Camelidae       | <i>Poebrotherium chadronense</i> | 24.43  | 36.985 | 2.389 |        |       |
| Hypertragulidae | <i>Nanotragulus ordinatus</i>    | 4.26   | 19     | 1.52  |        |       |
| Hypertragulidae | <i>Nanotragulus ordinatus</i>    | 4.26   | 21.25  | 1.52  |        |       |
| Hypertragulidae | <i>Nanotragulus</i> sp.          | 2.08   | 25.445 | 1.262 | 0.679  | 6.481 |
| Hypertragulidae | <i>Nanotragulus fontanus</i>     | 3.05   | 28.82  | 1.394 |        |       |
| Hypertragulidae | <i>Nanotragulus</i> sp.          | 2.08   | 31     | 1.262 | 0.407  | 6.216 |
| Hypertragulidae | <i>Nanotragulus planiceps</i>    | 1.79   | 32.85  | 1.214 | 0      | 6.174 |
| Hypertragulidae | <i>Hypertragulus calcaratus</i>  | 3.05   | 34.2   | 1.394 |        |       |
| Hypertragulidae | <i>Hypertragulus heikeni</i>     | 4.35   | 35.2   | 1.528 |        |       |
| Hypertragulidae | <i>Hypertragulus heikeni</i>     | 4.35   | 36.985 | 1.528 |        |       |
| Hypertragulidae | <i>Hypertragulus heikeni</i>     | 4.35   | 38.8   | 1.528 |        |       |
| Hypertragulidae | <i>Simimeryx minutus</i>         | 1.08   | 41.96  | 1.065 | 0.968  | 6.392 |

## References

1. Smith FA, *et al.* (2010) The evolution of maximum body size of terrestrial mammals. *Science* 330:1216-1219.
2. Lewontin RC (1966) On the measurement of relative variability. *Syst. Zool.* 15(2):141-142.
3. Smith RJ (1984) Allometric scaling in comparative biology: problems of concept and method. *American Journal of Physiology* 246(2):R152-R160.
4. Van Valkenburgh B (1990) Skeletal and dental predictors of body mass in carnivores. *Body Size in Mammalian Paleobiology: Estimation and Biological Implications*, eds Damuth J & MacFadden BJ (Cambridge University Press, Cambridge), pp 182-205.
5. Silva M & Downing JA (1995) *CRC Handbook of Mammalian Body Masses* (CRC Press, Boca Raton).
6. Gingerich PD (2001) Rates of evolution on the time scale of the evolutionary process. *Genetica* 112-113:127-144.
7. Mattila TM & Bokma F (2008) Extant mammal body masses suggest punctuated equilibrium. *Proc. R. Soc. London Ser. B* 275:2195-2199.
8. Yablokov AV (1974) *Variability of Mammals* (Amerind Publishing, New Dehli).
9. Ruff CB, Trinkaus E, & Holliday TW (1997) Body mass and encephalization in Pleistocene Homo. *Nature* 387(6629):173-176.
10. Mead AJ (2000) Sexual dimorphism and paleoecology in *Teleoceras*, a North American Miocene rhinoceros. *Paleobiology* 26(4):689-706.
11. Gingerich PD (1993) Rates of evolution in Plio-Pleistocene mammals: six case studies. *Morphological Change in Quaternary Mammals of North America*, eds Martin RA & Barnosky AD (Cambridge University Press, Cambridge), pp 84-106.
12. Hamilton MJ, Davidson AD, Sibly RM, & Brown JH (2011) Universal scaling of production rates across mammalian lineages. *Proc. R. Soc. London Ser. B* 278(1705):560-566.
13. R Development Core Team (2009) *R: A Language and Environment for Statistical Computing v2.10.1* (R Foundation for Statistical Computing, Vienna).
14. Millien V (2006) Morphological evolution is accelerated among island mammals. *PLoS Biology* 4(10):1863-1868.
15. Hunt G (2007) The relative importance of directional change, random walks, and stasis in the evolution of fossil lineages. *Proc. Natl Acad. Sci. USA* 104(47):18404-18408.
16. Lister AM (1989) Rapid dwarfing of red deer on Jersey in the last interglacial. *Nature* 342(6249):539-542.
17. Roth VL (1992) Inferences from allometry and fossils: Dwarfing of elephants on islands. *Oxf. Surv. Evol. Biol.* 8:259-288.
18. Davies P & Lister AM (2001) *Palaeoloxodon cypriotes*, the dwarf elephant of Cyprus: size and scaling comparisons with *P. falconeri* (Sicily-Malta) and mainland *P. antiquus*. *The World of Elephants: Proceedings of the 1st International Congress, Rome 2001*, ed Cavarretta G (Ufficio Pubblicazioni, Rome), pp 479-480.
19. Lister A & Bahn PG (2007) *Mammoths: Giants of the Ice Age* (University of California Press, Berkeley, Calif.) Rev. Ed.
20. Christiansen P (2004) Body size in proboscideans, with notes on elephant metabolism. *Zool. J. Linn. Soc.* 140(4):523-549.

21. Benton MJ, *et al.* (2010) Dinosaurs and the island rule: The dwarfed dinosaurs from Hateg Island. *Palaeogeogr. Palaeoclimatol. Palaeoecol.* 293(3-4):438-454.
22. Quintana J, Koehler M, & Moya-Sola S (2011) *Nuralagus rex*, gen. et sp. nov., an endemic insular giant rabbit from the Neogene of Minorca (Balearic Islands, Spain). *J. Vert. Paleont.* 31(2):231-240.
23. Renaud S, Michaux J, Jaeger JJ, & Auffray JC (1996) Fourier analysis applied to *Stephanomys* (Rodentia, Muridae) molars: Nonprogressive evolutionary pattern in a gradual lineage. *Paleobiology* 22(2):255-265.
24. Anderson RP & Handley CO (2001) A new species of three-toed sloth (Mammalia: Xenarthra) from Panama, with a review of the genus *Bradypus*. *Proceedings of the Biological Society of Washington* 114(1):1-33.
25. Anderson RP & Handley CO (2002) Dwarfism in insular sloths: Biogeography, selection, and evolutionary rate. *Evolution* 56(5):1045-1058.
26. Bader RS (1955) Variability and evolutionary rate in the oreodonts. *Evolution* 9(2):119-140.
27. Janis CM (1990) Correlation of cranial and dental variables with body size in ungulates and macropodoids. *Body Size in Mammalian Paleobiology: Estimation and Biological Implications*, eds Damuth J & MacFadden BJ (Cambridge University Press, Cambridge), pp 255-299.
28. Berry RJ (1964) Evolution of island population of house mouse. *Evolution* 18(3):468-&
29. Berry RJ, Jakobson ME, & Peters J (1978) The House mice of Faroe Islands: a study in microdifferentiation. *Journal of Zoology* 185(MAY):73-92.
30. Clyde WC & Gingerich PD (1994) Rates of evolution in the dentition of early Eocene *Cantius*: comparison of size and shape. *Paleobiology* 20(4):506-522.
31. Gingerich PD, Smith BH, & Rosenberg K (1982) Allometric scaling in the dentition of primates and prediction of body weight from tooth size in fossils. *Am. J. Phys. Anthropol.* 58(1):81-100.
32. Davis S (1977) Size variation of fox, *Vulpes vulpes* in palaeartic region today, and in Israel during late Quaternary. *Journal of Zoology* 182(JUL):343-351.
33. Forsten A (1990) Dental size trends in an equid sample from the Sandalja II cave of northwestern Yugoslavia. *Paläontologische Zeitschrift, Stuttgart* 64:153-160.
34. Goodwin HT (1993) Patterns of dental variation and evolution in prairie dogs, genus *Cynomys*. *Morphological Change in Quaternary Mammals of North America*, eds Martin RA & Barnosky AD (Cambridge University Press, Cambridge), pp 107-133.
35. Legendre S (1986) Analysis of mammalian communities from the late Eocene and Oligocene of southern France. *Palaeovertebrata* 16:191-212.
36. Guthrie RD (2003) Rapid body size decline in Alaskan Pleistocene horses before extinction. *Nature* 426(6963):169-171.
37. Scott KM (1990) Postcranial dimensions of ungulates as predictors of body mass. *Body Size in Mammalian Paleobiology: Estimation and Biological Implications*, eds Damuth J & MacFadden BJ (Cambridge University Press, Cambridge), pp 301-335.
38. Klein RG (1995) The Tor Hamar fauna. *Prehistoric Cultural Ecology and Evolution: Insights from Southern Jordan*, ed Henry DO (Plenum, New York), pp 405-416.
39. Klein RG & Scott K (1989) Glacial interglacial size variation in fossil spotted hyenas (*Crocota crocuta*) from Britain. *Quat. Res.* 32(1):88-95.



40. Köhler M & Moyà-Solà S (2004) Reduction of brain and sense organs in the fossil insular bovid *Myotragus*. *Brain Behav. Evol.* 63(3):125-140.
41. Lich DK (1990) *Cosomys primus*: a case for stasis. *Paleobiology* 16(3):384-395.
42. Martin RA (1990) Estimating body mass and correlated variables in extinct mammals: travels in the fourth dimension. *Body Size in Mammalian Paleobiology: Estimation and Biological Implications*, eds Damuth J & MacFadden BJ (Cambridge University Press, Cambridge), pp 49-68.
43. Marshall LG (1973) The Lake Victoria Local Fauna. MSc. thesis, Vols. I + II MSc. thesis (Monash University, Melbourne, Australia).
44. Bartholomai A (1971) Morphology and variation of the cheek teeth in *Macropus giganteus* Shaw and *Macropus agilis* (Gould). *Memoirs of the Queensland Museum* 16:1-18.
45. Marshall LG & Hope JH (1973) A reevaluation of *Dasyurus bowlingi* Spencer and Kershaw 1910 (Marsupialia, Dasyuridae) from King Island, Bass Strait. *Proceedings of the Royal Society of Victoria* 85(2):225-236.
46. Gordon CL (2003) A first look at estimating body size in dentally conservative marsupials. *Journal of Mammalian Evolution* 10(1/2):1-21.
47. Martin RA (1986) Energy, ecology, and cotton rat evolution. *Paleobiology* 12(4):370-382.
48. McDonald JN (1981) *North American Bison: their Classification and Evolution* (University of California Press, Berkeley).
49. Millien V (2004) Relative effects of climate change, isolation and competition on body-size evolution in the Japanese field mouse, *Apodemus argenteus*. *J. Biogeogr.* 31(8):1267-1276.
50. Millien-Parra V (2000) Species differentiation among muroid rodents on the basis of their lower incisor size and shape: ecological and taxonomical implications. *Mammalia* 64(2):221-239.
51. Millien V & Damuth J (2004) Climate change and size evolution in an island rodent species: New perspectives on the island rule. *Evolution* 58(6):1353-1360.
52. Polly PD (2001) Paleontology and the comparative method: ancestral node reconstructions versus observed node values. *Am. Nat.* 157(6):596-609.
53. Prothero DR & Heaton TH (1996) Faunal stability during the Early Oligocene climatic crash. *Palaeogeogr. Palaeoclimatol. Palaeoecol.* 127(1-4):257-283.
54. Jones KE, *et al.* (2009) PanTHERIA: a species-level database of life history, ecology, and geography of extant and recently extinct mammals. *Ecology* 90(9):2648.
55. Smith FA (1992) Evolution of body size among woodrats from Baja California, Mexico. *Funct. Ecol.* 6(3):265-273.
56. Smith FA, Betancourt JL, & Brown JH (1995) Evolution of body size in the woodrat over the past 25,000 years of climate change. *Science* 270(5244):2012-2014.
57. Smith FA & Betancourt JL (1998) Response of bushy-tailed woodrats (*Neotoma cinerea*) to late Quaternary climatic change in the Colorado Plateau. *Quat. Res.* 50(1):1-11.
58. Smith FA & Betancourt JL (2003) The effect of Holocene temperature fluctuations on the evolution and ecology of *Neotoma* (woodrats) in Idaho and northwestern Utah. *Quat. Res.* 59(2):160-171.

59. Smith FA & Betancourt JL (2006) Predicting woodrat (*Neotoma*) responses to anthropogenic warming from studies of the palaeomidden record. *J. Biogeogr.* 33(12):2061-2076.
60. Szuma E (2003) Microevolutionary trends in the dentition of the Red fox (*Vulpes vulpes*). *Journal of Zoological Systematics and Evolutionary Research* 41(1):47-56.
61. Lister AM (2004) Ecological interactions of elephantids in Pleistocene Eurasia: *Palaeoloxodon* and *Mammuthus*. *Human Paleoecology in the Levantine Corridor*, eds Goren-Inbar N & Speth JD (Oxbow, Oxford), pp. 53-60.
